# Supplementary material for: Host-Associated and Free-Living Phage Communities Differ Profoundly in Phylogenetic Composition
Source: PLoS One. 2011 Feb 24;6(2):e16900. doi: 10.1371/journal.pone.0016900 (PMC3044705; doi:10.1371/journal.pone.0016900)
Supplement: Table S3 — Full QIIME metadata mapping file. (XLS) [file pone.0016900.s003.xls]

## Sheet: Caporaso_et_al_SupplementaryTab
#SampleID	db	Host-type	Host-associated	Family	Individual	Targeted viral type	Filter size (um)	db filename	Sample type
angly2006_Arctic.fasta	CAMERA	Free-living (mesophilic)	No	na	na	DNA	0 - 0.22	angly2006/Arctic_fasta.gz	Ocean (db:CAMERA)
angly2006_BBC.fasta	CAMERA	Free-living (mesophilic)	No	na	na	DNA	0 - 0.22	angly2006/BBC_fasta.gz	Ocean (db:CAMERA)
angly2006_GOM.fasta	CAMERA	Free-living (mesophilic)	No	na	na	DNA	0 - 0.22	angly2006/GOM_fasta.gz	Ocean (db:CAMERA)
angly2006_SAR.fasta	CAMERA	Free-living (mesophilic)	No	na	na	DNA	0 - 0.22	angly2006/SAR_fasta.gz	Ocean (db:CAMERA)
desnues2008_SRR001044.PAStromCCMexVir072205.fasta	CAMERA	Free-living (mesophilic)	No	na	na	DNA	0.02 - 0.22	desnues2008/SRR001044_PAStromCCMexVir072205_fasta.gz	Freshwater stromatolite
desnues2008_SRR001045.RMStromCCMexVir072205.fasta	CAMERA	Free-living (mesophilic)	No	na	na	DNA	0.02 - 0.22	desnues2008/SRR001045_RMStromCCMexVir072205_fasta.gz	Freshwater stromatolite
desnues2008_SRR001061.HBCStromBahamasVir011105.fasta	CAMERA	Free-living (mesophilic)	No	na	na	DNA	0.02 - 0.22	desnues2008/SRR001061_HBCStromBahamasVir011105_fasta.gz	Marine stromatolite
dinsdale2008_HighSalternSDbayVir20051116.fasta	CAMERA	Free-living (mesophilic)	No	na	na	DNA	unavailable	dinsdale2008/HighSalternSDbayVir20051116_fasta.gz	Saltern (high)
dinsdale2008_HighSalternSDbayVir20051128.fasta	CAMERA	Free-living (mesophilic)	No	na	na	DNA	unavailable	dinsdale2008/HighSalternSDbayVir20051128_fasta.gz	Saltern (high)
dinsdale2008_HighSalternSDbayVir20051207.fasta	CAMERA	Free-living (mesophilic)	No	na	na	DNA	unavailable	dinsdale2008/HighSalternSDbayVir20051207_fasta.gz	Saltern (high)
dinsdale2008_LowSalternSDbayVir200407.fasta	CAMERA	Free-living (mesophilic)	No	na	na	DNA	unavailable	dinsdale2008/LowSalternSDbayVir200407_fasta.gz	Saltern (low)
dinsdale2008_LowSalternSDbayVir20051110.fasta	CAMERA	Free-living (mesophilic)	No	na	na	DNA	unavailable	dinsdale2008/LowSalternSDbayVir20051110_fasta.gz	Saltern (low)
dinsdale2008_LowSalternSDbayVir20051128.fasta	CAMERA	Free-living (mesophilic)	No	na	na	DNA	unavailable	dinsdale2008/LowSalternSDbayVir20051128_fasta.gz	Saltern (low)
dinsdale2008_MedSalternSDbayVir20051110.fasta	CAMERA	Free-living (mesophilic)	No	na	na	DNA	unavailable	dinsdale2008/MedSalternSDbayVir20051110_fasta.gz	Saltern (medium)
dinsdale2008_MedSalternSDbayVir20051111.fasta	CAMERA	Free-living (mesophilic)	No	na	na	DNA	unavailable	dinsdale2008/MedSalternSDbayVir20051111_fasta.gz	Saltern (medium)
dinsdale2008_MedSalternSDbayVir20051116.fasta	CAMERA	Free-living (mesophilic)	No	na	na	DNA	unavailable	dinsdale2008/MedSalternSDbayVir20051116_fasta.gz	Saltern (medium)
dinsdale2008_MedSalternSDbayVir20051122.fasta	CAMERA	Free-living (mesophilic)	No	na	na	DNA	unavailable	dinsdale2008/MedSalternSDbayVir20051122_fasta.gz	Saltern (medium)
dinsdale2008_MedSalternSDbayVir20051128.fasta	CAMERA	Free-living (mesophilic)	No	na	na	DNA	unavailable	dinsdale2008/MedSalternSDbayVir20051128_fasta.gz	Saltern (medium)
rosario2009_SRR014584.EffluentDNA.fasta	CAMERA	Free-living (mesophilic)	No	na	na	DNA	0.2 - 0.22	rosario2009/SRR014584_EffluentDNA_fasta.gz	Reclaimed water at discharge point
rosario2009_SRR014586.NurseryDNA.fasta	CAMERA	Free-living (mesophilic)	No	na	na	DNA	0.2 - 0.22	rosario2009/SRR014586_NurseryDNA_fasta.gz	Reclaimed water at point-of-use
rosario2009_SRR014588.ParkDNA.fasta	CAMERA	Free-living (mesophilic)	No	na	na	DNA	0.2 - 0.22	rosario2009/SRR014588_ParkDNA_fasta.gz	Reclaimed water at point-of-use
rosario2009_SRR014589.PotalDNA.fasta	CAMERA	Free-living (mesophilic)	No	na	na	DNA	0.2 - 0.22	rosario2009/SRR014589_PotalDNA_fasta.gz	Potable water
schoenfeld2008_BEARPAW.SMPL.20031007.fasta	CAMERA	Free-living (thermophilic)	No	na	na	DNA	0.2	schoenfeld2008/BEARPAW_SMPL_20031007_fasta.gz	Hot Spring (YNP)
schoenfeld2008_OCTOPUS.SMPL.20031004.fasta	CAMERA	Free-living (thermophilic)	No	na	na	DNA	0.2	schoenfeld2008/OCTOPUS_SMPL_20031004_fasta.gz	Hot Spring (YNP)
human_lung_4440441.3	MG-RAST	Human Lung	Yes	na	na	DNA	unavailable	human_lung/4440441.3.fasta	Cystic fibrosis human lung
human_lung_4440442.4	MG-RAST	Human Lung	Yes	na	na	DNA	unavailable	human_lung/4440442.4.fasta	Healthy human lung
human_lung_4440442.5	MG-RAST	Human Lung	Yes	na	na	DNA	unavailable	human_lung/4440442.5.fasta	Healthy human lung
human_lung_4440026.3.dna.fa	MG-RAST	Human Lung	Yes	na	na	DNA	unavailable	human_lung/4440026.3.dna.fa.gz	Cystic fibrosis human lung
human_lung_4440051.3.dna.fa	MG-RAST	Human Lung	Yes	na	na	DNA	unavailable	human_lung/4440051.3.dna.fa.gz	Cystic fibrosis human lung
ocean_viruses_4440304.3	MG-RAST	Free-living (mesophilic)	No	na	na	DNA	0 - 0.22	ocean_viruses/4440304.3.fasta	Ocean (db:MG-RAST)
ocean_viruses_4440305.3	MG-RAST	Free-living (mesophilic)	No	na	na	DNA	0 - 0.22	ocean_viruses/4440305.3.fasta	Ocean (db:MG-RAST)
ocean_viruses_4440306.3	MG-RAST	Free-living (mesophilic)	No	na	na	DNA	0 - 0.22	ocean_viruses/4440306.3.fasta	Ocean (db:MG-RAST)
ocean_viruses_4440322.3	MG-RAST	Free-living (mesophilic)	No	na	na	DNA	0 - 0.22	ocean_viruses/4440322.3.fasta	Ocean (db:MG-RAST)
mosquito_4440052.3.dna.fa	MG-RAST	Mosquito	Yes	na	na	DNA	unavailable	mosquito/4440052.3.dna.fa.gz	Mosquito-associated
mosquito_4440053.3.dna.fa	MG-RAST	Mosquito	Yes	na	na	DNA	unavailable	mosquito/4440053.3.dna.fa.gz	Mosquito-associated
mosquito_4440054.3.dna.fa	MG-RAST	Mosquito	Yes	na	na	DNA	unavailable	mosquito/4440054.3.dna.fa.gz	Mosquito-associated
reyes2010_F1M.2.FPZU02C.fna	Direct from author	Human Feces	Yes	1	F1M	DNA	0.22	reyes2010/F1M.2_FPZU02C.fna.gz	Human feces
reyes2010_F1T1.3.fna	Direct from author	Human Feces	Yes	1	F1T1	DNA	0.22	reyes2010/F1T1.3.fna.gz	Human feces
reyes2010_F1T2.1.R.FPZU02C.fna	Direct from author	Human Feces	Yes	1	F1T1	DNA	0.22	reyes2010/F1T2.1_R_FPZU02C.fna.gz	Human feces
reyes2010_F2M.2.FL277ID.fna	Direct from author	Human Feces	Yes	2	F2M	DNA	0.22	reyes2010/F2M.2_FL277ID.fna.gz	Human feces
reyes2010_F2T1.3.fna	Direct from author	Human Feces	Yes	2	F2T1	DNA	0.22	reyes2010/F2T1.3.fna.gz	Human feces
reyes2010_F2T2.1.R.FL277ID.fna	Direct from author	Human Feces	Yes	2	F2T2	DNA	0.22	reyes2010/F2T2.1_R_FL277ID.fna.gz	Human feces
reyes2010_F2M.2.FPK2RZS.fna	Direct from author	Human Feces	Yes	2	F2M	DNA	0.22	reyes2010/F2M.2_FPK2RZS.fna.gz	Human feces
reyes2010_F2M.3.FL277ID.fna	Direct from author	Human Feces	Yes	2	F2M	DNA	0.22	reyes2010/F2M.3_FL277ID.fna.gz	Human feces
reyes2010_F2M.3.fna	Direct from author	Human Feces	Yes	2	F2M	DNA	0.22	reyes2010/F2M.3.fna.gz	Human feces
reyes2010_F2T1.1.R.FPK2RZS.fna	Direct from author	Human Feces	Yes	2	F2T1	DNA	0.22	reyes2010/F2T1.1_R_FPK2RZS.fna.gz	Human feces
reyes2010_F2T1.2.FPK2RZS.fna	Direct from author	Human Feces	Yes	2	F2T1	DNA	0.22	reyes2010/F2T1.2_FPK2RZS.fna.gz	Human feces
reyes2010_F2T2.1.R.FPK2RZS.fna	Direct from author	Human Feces	Yes	2	F2T2	DNA	0.22	reyes2010/F2T2.1_R_FPK2RZS.fna.gz	Human feces
reyes2010_F2T2.2.FPK2RZS.fna	Direct from author	Human Feces	Yes	2	F2T2	DNA	0.22	reyes2010/F2T2.2_FPK2RZS.fna.gz	Human feces
reyes2010_F3M.3.fna	Direct from author	Human Feces	Yes	3	F3M	DNA	0.22	reyes2010/F3M.3.fna.gz	Human feces
reyes2010_F3T2.3.fna	Direct from author	Human Feces	Yes	3	F3T2	DNA	0.22	reyes2010/F3T2.3.fna.gz	Human feces
reyes2010_F3T2.3.FPK2RZS.fna	Direct from author	Human Feces	Yes	3	F3T2	DNA	0.22	reyes2010/F3T2.3_FPK2RZS.fna.gz	Human feces
reyes2010_F3T1.2.FLVMBU3.fna	Direct from author	Human Feces	Yes	3	F3T1	DNA	0.22	reyes2010/F3T1.2_FLVMBU3.fna.gz	Human feces
reyes2010_F3T1.3.FLVMBU3.fna	Direct from author	Human Feces	Yes	3	F3T1	DNA	0.22	reyes2010/F3T1.3_FLVMBU3.fna.gz	Human feces
reyes2010_F4M.2.FLVMBU3.fna	Direct from author	Human Feces	Yes	4	F4M	DNA	0.22	reyes2010/F4M.2_FLVMBU3.fna.gz	Human feces
reyes2010_F4M.3.FLVMBU3.fna	Direct from author	Human Feces	Yes	4	F4M	DNA	0.22	reyes2010/F4M.3_FLVMBU3.fna.gz	Human feces
reyes2010_F4M.3.fna	Direct from author	Human Feces	Yes	4	F4M	DNA	0.22	reyes2010/F4M.3.fna.gz	Human feces
reyes2010_F4T1.1.FLVMBU3.fna	Direct from author	Human Feces	Yes	4	F4T1	DNA	0.22	reyes2010/F4T1.1_FLVMBU3.fna.gz	Human feces
reyes2010_F4T1.2.FLVMBU3.fna	Direct from author	Human Feces	Yes	4	F4T1	DNA	0.22	reyes2010/F4T1.2_FLVMBU3.fna.gz	Human feces
reyes2010_F4T1.3.FLVMBU3.fna	Direct from author	Human Feces	Yes	4	F4T1	DNA	0.22	reyes2010/F4T1.3_FLVMBU3.fna.gz	Human feces
reyes2010_F4T2.1.FLVMBU3.fna	Direct from author	Human Feces	Yes	4	F4T2	DNA	0.22	reyes2010/F4T2.1_FLVMBU3.fna.gz	Human feces
reyes2010_F4T2.3.FLVMBU3.fna	Direct from author	Human Feces	Yes	4	F4T2	DNA	0.22	reyes2010/F4T2.3_FLVMBU3.fna.gz	Human feces
reyes2010_F3T1.3.FLOCGI1.fna	Direct from author	Human Feces	Yes	3	F3T1	DNA	0.22	reyes2010/F3T1.3_FLOCGI1.fna.gz	Human feces
reyes2010_F3T1.3.fna	Direct from author	Human Feces	Yes	3	F3T1	DNA	0.22	reyes2010/F3T1.3.fna.gz	Human feces
reyes2010_F4M.1.FYV5YCZ.fna	Direct from author	Human Feces	Yes	4	F4M	DNA	0.22	reyes2010/F4M.1_FYV5YCZ.fna.gz	Human feces
reyes2010_F4M.3.FLOCGI1.fna	Direct from author	Human Feces	Yes	4	F4M	DNA	0.22	reyes2010/F4M.3_FLOCGI1.fna.gz	Human feces
reyes2010_F4T1.1.FLOCGI1.fna	Direct from author	Human Feces	Yes	4	F4T1	DNA	0.22	reyes2010/F4T1.1_FLOCGI1.fna.gz	Human feces
reyes2010_F4T1.2.FLOCGI1.fna	Direct from author	Human Feces	Yes	4	F4T1	DNA	0.22	reyes2010/F4T1.2_FLOCGI1.fna.gz	Human feces
reyes2010_F4T1.3.FLOCGI1.fna	Direct from author	Human Feces	Yes	4	F4T1	DNA	0.22	reyes2010/F4T1.3_FLOCGI1.fna.gz	Human feces
reyes2010_F4T1.3.fna	Direct from author	Human Feces	Yes	4	F4T1	DNA	0.22	reyes2010/F4T1.3.fna.gz	Human feces
reyes2010_F4T2.3.FLOCGI1.fna	Direct from author	Human Feces	Yes	4	F4T2	DNA	0.22	reyes2010/F4T2.3_FLOCGI1.fna.gz	Human feces
reyes2010_F4T2.3.fna	Direct from author	Human Feces	Yes	4	F4T2	DNA	0.22	reyes2010/F4T2.3.fna.gz	Human feces
reyes2010_F2M.3.FPK2RZS.fna	Direct from author	Human Feces	Yes	2	F2M	DNA	0.22	reyes2010/F2M.3_FPK2RZS.fna.gz	Human feces
reyes2010_F2T1.1.E3MCXE4.fna	Direct from author	Human Feces	Yes	2	F2T1	DNA	0.22	reyes2010/F2T1.1_E3MCXE4.fna.gz	Human feces
reyes2010_F2T1.2.FL277ID.fna	Direct from author	Human Feces	Yes	2	F2T1	DNA	0.22	reyes2010/F2T1.2_FL277ID.fna.gz	Human feces
reyes2010_F2T1.3.FL277ID.fna	Direct from author	Human Feces	Yes	2	F2T1	DNA	0.22	reyes2010/F2T1.3_FL277ID.fna.gz	Human feces
reyes2010_F2T2.1.E3MCXE4.fna	Direct from author	Human Feces	Yes	2	F2T2	DNA	0.22	reyes2010/F2T2.1_E3MCXE4.fna.gz	Human feces
reyes2010_F2T2.2.FL277ID.fna	Direct from author	Human Feces	Yes	2	F2T2	DNA	0.22	reyes2010/F2T2.2_FL277ID.fna.gz	Human feces
reyes2010_F2T2.3.fna	Direct from author	Human Feces	Yes	2	F2T2	DNA	0.22	reyes2010/F2T2.3.fna.gz	Human feces
reyes2010_F3T2.3.FL277ID.fna	Direct from author	Human Feces	Yes	3	F3T2	DNA	0.22	reyes2010/F3T2.3_FL277ID.fna.gz	Human feces
reyes2010_F4M.2.FLOCGI1.fna	Direct from author	Human Feces	Yes	4	F4M	DNA	0.22	reyes2010/F4M.2_FLOCGI1.fna.gz	Human feces
reyes2010_F5T2.1.R.FPZU02C.fna	Direct from author	Human Feces	Yes	5	F5T2	DNA	0.22	reyes2010/F5T2.1_R_FPZU02C.fna.gz	Human feces
reyes2010_F1M.2.FQCPN2T.fna	Direct from author	Human Feces	Yes	1	F1M	DNA	0.22	reyes2010/F1M.2_FQCPN2T.fna.gz	Human feces
reyes2010_F1T2.1.R.FQCPN2T.fna	Direct from author	Human Feces	Yes	1	F1T2	DNA	0.22	reyes2010/F1T2.1_R_FQCPN2T.fna.gz	Human feces
reyes2010_F1T2.2.FQCPN2T.fna	Direct from author	Human Feces	Yes	1	F1T2	DNA	0.22	reyes2010/F1T2.2_FQCPN2T.fna.gz	Human feces
reyes2010_F1T2.3.FQCPN2T.fna	Direct from author	Human Feces	Yes	1	F1T2	DNA	0.22	reyes2010/F1T2.3_FQCPN2T.fna.gz	Human feces
reyes2010_F3M.1.FQCPN2T.fna	Direct from author	Human Feces	Yes	3	F3M	DNA	0.22	reyes2010/F3M.1_FQCPN2T.fna.gz	Human feces
reyes2010_F3M.2.FQCPN2T.fna	Direct from author	Human Feces	Yes	3	F3M	DNA	0.22	reyes2010/F3M.2_FQCPN2T.fna.gz	Human feces
reyes2010_F5T2.1.R.FQCPN2T.fna	Direct from author	Human Feces	Yes	5	F5T2	DNA	0.22	reyes2010/F5T2.1_R_FQCPN2T.fna.gz	Human feces
reyes2010_F1M.3.fna	Direct from author	Human Feces	Yes	1	F1M	DNA	0.22	reyes2010/F1M.3.fna.gz	Human feces
reyes2010_F1T2.1.E3MCXE4.fna	Direct from author	Human Feces	Yes	1	F1T2	DNA	0.22	reyes2010/F1T2.1_E3MCXE4.fna.gz	Human feces
reyes2010_F1T2.2.FPZU02C.fna	Direct from author	Human Feces	Yes	1	F1T2	DNA	0.22	reyes2010/F1T2.2_FPZU02C.fna.gz	Human feces
reyes2010_F1T2.3.fna	Direct from author	Human Feces	Yes	1	F1T2	DNA	0.22	reyes2010/F1T2.3.fna.gz	Human feces
reyes2010_F2M.1.E3MCXE4.fna	Direct from author	Human Feces	Yes	2	F2M	DNA	0.22	reyes2010/F2M.1_E3MCXE4.fna.gz	Human feces
reyes2010_F3M.2.FPZU02C.fna	Direct from author	Human Feces	Yes	3	F3M	DNA	0.22	reyes2010/F3M.2_FPZU02C.fna.gz	Human feces
reyes2010_F3T1.1.FLOCGI1.fna	Direct from author	Human Feces	Yes	3	F3T1	DNA	0.22	reyes2010/F3T1.1_FLOCGI1.fna.gz	Human feces
reyes2010_F3M.1.FPZU02C.fna	Direct from author	Human Feces	Yes	3	F3M	DNA	0.22	reyes2010/F3M.1_FPZU02C.fna.gz	Human feces
reyes2010_F1T1.3.FPZU02C.fna	Direct from author	Human Feces	Yes	1	F1T1	DNA	0.22	reyes2010/F1T1.3_FPZU02C.fna.gz	Human feces
reyes2010_F1T2.3.FPZU02C.fna	Direct from author	Human Feces	Yes	1	F1T2	DNA	0.22	reyes2010/F1T2.3_FPZU02C.fna.gz	Human feces
reyes2010_F3T2.1.FYV5YCZ.fna	Direct from author	Human Feces	Yes	3	F3T2	DNA	0.22	reyes2010/F3T2.1_FYV5YCZ.fna.gz	Human feces
reyes2010_F4M.3.R.FLOCGI1.fna	Direct from author	Human Feces	Yes	4	F4M	DNA	0.22	reyes2010/F4M.3_R_FLOCGI1.fna.gz	Human feces
reyes2010_F4T2.1.FLOCGI1.fna	Direct from author	Human Feces	Yes	4	F4T2	DNA	0.22	reyes2010/F4T2.1_FLOCGI1.fna.gz	Human feces
reyes2010_F5T2.1.FL277ID.fna	Direct from author	Human Feces	Yes	5	F5T2	DNA	0.22	reyes2010/F5T2.1_FL277ID.fna.gz	Human feces
reyes2010_F4M.3.R.FLVMBU3.fna	Direct from author	Human Feces	Yes	4	F4M	DNA	0.22	reyes2010/F4M.3_R_FLVMBU3.fna.gz	Human feces
reyes2010_F1M.1.E3MCXE4.fna	Direct from author	Human Feces	Yes	1	F1M	DNA	0.22	reyes2010/F1M.1_E3MCXE4.fna.gz	Human feces
reyes2010_F1T1.1.E3MCXE4.fna	Direct from author	Human Feces	Yes	1	F1T1	DNA	0.22	reyes2010/F1T1.1_E3MCXE4.fna.gz	Human feces
reyes2010_F1T1.3.FQCPN2T.fna	Direct from author	Human Feces	Yes	1	F1T1	DNA	0.22	reyes2010/F1T1.3_FQCPN2T.fna.gz	Human feces
reyes2010_F2M.1.R.FL277ID.fna	Direct from author	Human Feces	Yes	2	F2M	DNA	0.22	reyes2010/F2M.1_R_FL277ID.fna.gz	Human feces
reyes2010_F2M.1.R.FPK2RZS.fna	Direct from author	Human Feces	Yes	2	F2M	DNA	0.22	reyes2010/F2M.1_R_FPK2RZS.fna.gz	Human feces
reyes2010_F2T1.1.R.FL277ID.fna	Direct from author	Human Feces	Yes	2	F2T1	DNA	0.22	reyes2010/F2T1.1_R_FL277ID.fna.gz	Human feces
reyes2010_F2T1.3.FPK2RZS.fna	Direct from author	Human Feces	Yes	2	F2T1	DNA	0.22	reyes2010/F2T1.3_FPK2RZS.fna.gz	Human feces
reyes2010_F3T1.1.FLVMBU3.fna	Direct from author	Human Feces	Yes	3	F3T1	DNA	0.22	reyes2010/F3T1.1_FLVMBU3.fna.gz	Human feces
reyes2010_F3T1.2.FLOCGI1.fna	Direct from author	Human Feces	Yes	3	F3T1	DNA	0.22	reyes2010/F3T1.2_FLOCGI1.fna.gz	Human feces
reyes2010_F3T2.2.FL277ID.fna	Direct from author	Human Feces	Yes	3	F3T2	DNA	0.22	reyes2010/F3T2.2_FL277ID.fna.gz	Human feces
reyes2010_F3T2.2.FPK2RZS.fna	Direct from author	Human Feces	Yes	3	F3T2	DNA	0.22	reyes2010/F3T2.2_FPK2RZS.fna.gz	Human feces
reyes2010_F5T2.1.FPK2RZS.fna	Direct from author	Human Feces	Yes	5	F5T2	DNA	0.22	reyes2010/F5T2.1_FPK2RZS.fna.gz	Human feces
coral_4440036.3.fa	MG-RAST	Northern Islands Coral	Yes	na	na	DNA	unavailable	coral/4440036.3.fa.gz	Coral (wild)
coral_4440038.3.fa	MG-RAST	Northern Islands Coral	Yes	na	na	DNA	unavailable	coral/4440038.3.fa.gz	Coral (wild)
coral_4440040.3.fa	MG-RAST	Northern Islands Coral	Yes	na	na	DNA	unavailable	coral/4440040.3.fa.gz	Coral (wild)
coral_4440280.3.fa	MG-RAST	Northern Islands Coral	Yes	na	na	DNA	unavailable	coral/4440280.3.fa.gz	Coral (wild)
hawaii_4440376.3.fa	MG-RAST	Porites compressa (coral)	Yes	na	na	DNA	unavailable	hawaii/4440376.3.fa.gz	Coral (wild)
hawaii_4440374.3.fa	MG-RAST	Porites compressa (coral)	Yes	na	na	DNA	unavailable	hawaii/4440374.3.fa.gz	Coral (aquarium control)
hawaii_4440370.3.fa	MG-RAST	Porites compressa (coral)	Yes	na	na	DNA	unavailable	hawaii/4440370.3.fa.gz	Coral (dissolved organic carbon stressed)
hawaii_4440371.3.fa	MG-RAST	Porites compressa (coral)	Yes	na	na	DNA	unavailable	hawaii/4440371.3.fa.gz	Coral (pH stressed)
hawaii_4440377.3.fa	MG-RAST	Porites compressa (coral)	Yes	na	na	DNA	unavailable	hawaii/4440377.3.fa.gz	Coral (nutrient stressed)
hawaii_4440375.3.fa	MG-RAST	Porites compressa (coral)	Yes	na	na	DNA	unavailable	hawaii/4440375.3.fa.gz	Coral (temperature stressed)
tilapia_pond_4440424.3.fa	MG-RAST	Free-living (mesophilic)	No	na	na	DNA	unavailable	tilapia_pond/4440424.3.fa.gz	Freshwater
tilapia_pond_4440412.3.fa	MG-RAST	Free-living (mesophilic)	No	na	na	DNA	unavailable	tilapia_pond/4440412.3.fa.gz	Freshwater
tilapia_pond_4440414.3.fa	MG-RAST	Free-living (mesophilic)	No	na	na	DNA	unavailable	tilapia_pond/4440414.3.fa.gz	Freshwater
tilapia_pond_4440439.3.fa	MG-RAST	Free-living (mesophilic)	No	na	na	DNA	unavailable	tilapia_pond/4440439.3.fa.gz	Freshwater
