# Supplementary material for: Host-Associated and Free-Living Phage Communities Differ Profoundly in Phylogenetic Composition
Source: PLoS One. 2011 Feb 24;6(2):e16900. doi: 10.1371/journal.pone.0016900 (PMC3044705; doi:10.1371/journal.pone.0016900)
Supplement: Table S4 — Full viral OTU table (i.e., metagenome × viral OTU abundance matrix). These data were used in jackknifed weighted Shotgun UniFrac calculations (Figure 3a). (XLS) [file pone.0016900.s004.xls]

## Sheet: Caporaso_et_al_SupplementaryTab
OTU ID	angly2006_Arctic.fasta	angly2006_BBC.fasta	angly2006_GOM.fasta	angly2006_SAR.fasta	desnues2008_SRR001044.PAStromCCMexVir072205.fasta	desnues2008_SRR001045.RMStromCCMexVir072205.fasta	desnues2008_SRR001061.HBCStromBahamasVir011105.fasta	dinsdale2008_HighSalternSDbayVir20051116.fasta	dinsdale2008_HighSalternSDbayVir20051128.fasta	dinsdale2008_HighSalternSDbayVir20051207.fasta	dinsdale2008_LowSalternSDbayVir200407.fasta	dinsdale2008_LowSalternSDbayVir20051110.fasta	dinsdale2008_LowSalternSDbayVir20051128.fasta	dinsdale2008_MedSalternSDbayVir20051110.fasta	dinsdale2008_MedSalternSDbayVir20051111.fasta	dinsdale2008_MedSalternSDbayVir20051116.fasta	dinsdale2008_MedSalternSDbayVir20051122.fasta	dinsdale2008_MedSalternSDbayVir20051128.fasta	rosario2009_SRR014584.EffluentDNA.fasta	rosario2009_SRR014586.NurseryDNA.fasta	rosario2009_SRR014588.ParkDNA.fasta	rosario2009_SRR014589.PotalDNA.fasta	schoenfeld2008_BEARPAW.SMPL.20031007.fasta	schoenfeld2008_OCTOPUS.SMPL.20031004.fasta	human_lung_4440441.3	human_lung_4440442.4	human_lung_4440442.5	human_lung_4440026.3.dna.fa	human_lung_4440051.3.dna.fa	ocean_viruses_4440304.3	ocean_viruses_4440305.3	ocean_viruses_4440306.3	ocean_viruses_4440322.3	mosquito_4440052.3.dna.fa	mosquito_4440053.3.dna.fa	mosquito_4440054.3.dna.fa	reyes2010_F1M.2.FPZU02C.fna	reyes2010_F1T1.3.fna	reyes2010_F1T2.1.R.FPZU02C.fna	reyes2010_F2M.2.FL277ID.fna	reyes2010_F2T1.3.fna	reyes2010_F2M.2.FPK2RZS.fna	reyes2010_F2M.3.FL277ID.fna	reyes2010_F2T1.1.R.FPK2RZS.fna	reyes2010_F2T1.2.FPK2RZS.fna	reyes2010_F2T2.1.R.FPK2RZS.fna	reyes2010_F2T2.2.FPK2RZS.fna	reyes2010_F3M.3.fna	reyes2010_F3T2.3.FPK2RZS.fna
Ach_L2	0	2	1	1	1	0	0	0	0	0	1	1	0	0	0	0	0	0	0	1	0	0	0	0	1	0	1	1	4	1	2	0	1	0	0	4	0	0	0	0	0	0	0	0	0	0	0	0	0
Ach_MVL1	0	0	0	0	1	0	0	0	0	0	0	0	0	0	0	0	0	0	0	0	0	0	0	0	1	0	0	1	1	0	0	0	0	0	0	0	0	0	0	0	0	0	0	0	0	0	0	0	0
Aci_bottleshaped_virus	0	0	2	3	3	0	0	1	0	0	1	0	0	0	0	0	0	0	1	2	0	0	0	0	1	0	5	1	6	2	0	0	3	0	1	0	0	0	0	0	0	0	0	0	0	0	0	0	0
Aci_fv_1	1	0	0	1	1	0	0	0	0	1	3	3	0	0	0	0	0	0	1	0	3	0	0	1	0	0	1	0	1	0	0	1	1	0	3	0	0	0	0	0	0	0	0	0	0	0	0	0	0
Aci_fv_2	21	2	1	9	2	1	7	0	0	1	3	1	0	0	0	0	0	0	0	0	0	0	0	0	0	0	7	0	7	1	2	21	9	1	0	1	0	0	0	0	0	0	0	0	0	0	0	0	0
Aci_fv_3	0	1	1	7	3	1	2	1	0	0	1	0	2	1	0	1	0	1	1	2	0	2	0	0	0	0	4	0	5	1	1	0	7	0	0	0	0	0	0	0	0	0	0	0	0	0	0	0	0
Aci_fv_6	0	0	0	2	1	0	0	0	0	0	1	0	0	0	0	1	0	0	2	0	0	0	0	0	0	0	4	0	4	0	0	0	2	0	2	1	0	0	0	0	0	0	0	0	0	0	0	0	0
Aci_fv_7	0	0	3	3	1	0	0	0	0	0	3	4	0	0	0	0	0	0	2	0	0	0	0	0	0	0	8	0	7	3	0	0	3	1	0	0	0	0	0	0	0	0	0	0	0	0	0	0	0
Aci_fv_8	1	1	0	4	1	366	0	0	0	0	1	1	0	0	0	0	1	0	6	7	3	0	0	0	0	0	9	0	3	0	1	1	4	0	0	0	0	0	0	0	0	0	0	0	0	0	0	0	0
Aci_fv_9	0	3	0	6	3	0	1	0	0	0	1	1	1	0	0	1	0	0	2	0	0	0	0	0	2	0	6	2	12	0	3	0	6	1	4	1	0	0	0	0	0	0	0	0	0	0	0	0	0
Aci_rodshaped_virus_1	0	1	0	1	0	0	0	0	0	0	0	0	1	0	0	0	0	4	0	0	0	0	0	0	0	0	2	0	4	0	1	0	1	0	0	0	0	0	0	0	0	0	0	0	0	0	0	0	0
Aci_ssv_1	0	1	0	7	1	0	1	0	0	0	0	1	0	1	0	1	0	0	0	0	0	0	1	4	0	0	3	0	4	0	1	0	7	1	0	0	0	0	0	0	0	0	0	0	0	0	0	0	0
Aci_twotailed_virus	1	2	1	7	3	0	0	0	0	0	2	3	0	1	0	0	2	1	1	1	2	5	1	1	0	0	9	0	11	1	2	1	7	3	0	0	0	0	0	0	0	0	0	0	0	0	0	0	0
Act_Av1	0	1	0	0	0	0	0	0	0	0	0	0	0	0	0	0	0	0	0	1	0	0	0	0	0	0	1	0	2	0	1	0	0	0	0	0	0	0	0	0	0	0	0	0	0	0	0	0	0
Act_phiAsp2	44	7	5	0	8	0	0	1	0	0	1	1	0	1	0	0	0	0	14	5	2	1	0	0	0	0	1	0	2	5	7	44	0	1	8	130	0	0	0	0	0	0	0	0	0	1	1	0	0
Acy_pisum_virus	0	2	0	0	0	1	0	0	0	0	1	0	0	0	0	0	0	0	0	0	0	0	0	0	0	0	2	0	5	0	2	0	0	3	2	0	0	0	0	0	0	0	0	0	0	0	0	0	0
Aer_25	6	6	4	12	7	1	3	5	0	3	9	4	1	2	0	3	0	0	9	7	16	4	0	1	2	0	17	1	27	4	6	6	12	11	3	1	0	0	0	0	0	2	0	0	0	0	2	0	1
Aer_phiO18P	7	3	3	0	0	85	0	2	0	0	1	0	2	1	2	2	1	0	0	1	1	0	0	0	0	0	0	0	1	3	3	7	0	8	11	1	0	0	0	0	0	0	0	0	0	0	0	0	0
Agg_S1249	4	2	1	4	0	0	0	2	0	0	0	0	0	0	0	0	0	0	0	1	5	0	0	0	0	1	5	0	1	1	2	4	4	0	0	0	0	0	0	0	0	0	0	0	0	0	0	0	0
Alt_PM2	0	0	0	3	0	0	0	0	0	0	2	0	0	0	1	0	0	0	0	0	1	0	0	0	0	1	1	0	0	0	0	0	3	1	1	0	0	0	0	0	0	0	0	0	0	0	0	0	0
Arc_BJ1_virus	35	2	5	0	3	0	0	103	0	4	3	0	6	0	5	4	4	3	1	1	1	1	0	0	0	0	0	0	0	5	2	35	0	3	19	6	0	0	0	0	0	0	0	0	0	0	0	0	0
Azo_Cd	30	6	6	0	0	3	0	0	0	1	5	0	0	0	0	0	0	1	13	7	0	0	0	2	0	0	0	0	0	6	6	30	0	3	13	1	0	0	0	0	0	0	0	0	0	0	0	0	1
Bac_0305phi836	1	9	5	17	12	3	6	3	0	0	11	5	4	0	2	2	1	0	0	9	10	4	0	0	1	1	9	1	14	5	9	1	17	5	4	1	0	0	0	0	0	0	0	0	0	0	0	0	3
Bac_11b	1	13	5	8	10	0	3	3	0	1	11	4	0	0	0	1	9	0	26	32	20	2	0	0	1	1	16	1	12	5	13	1	8	1	2	0	0	0	0	0	0	1	0	0	0	0	0	0	0
Bac_2638A	0	6	2	4	1	0	2	1	0	0	0	2	1	1	0	1	0	0	8	13	5	0	0	0	0	0	3	0	1	2	6	0	4	0	1	0	0	0	0	0	0	0	0	0	0	0	0	0	0
Bac_29	0	0	0	0	0	0	0	0	0	0	0	0	0	0	0	0	0	0	0	0	0	0	0	0	0	1	1	0	3	0	0	0	0	0	0	0	0	0	0	0	0	0	0	0	0	0	0	0	0
Bac_37	0	13	2	8	6	0	1	1	0	0	2	2	1	1	0	0	0	0	3	2	4	0	0	0	0	1	3	0	5	2	13	0	8	2	1	1	0	0	0	0	0	0	0	0	0	0	0	0	0
Bac_42e	0	0	0	0	0	0	2	0	0	0	1	1	0	0	0	0	0	0	2	0	1	0	0	0	1	0	3	0	2	0	0	0	0	14	0	0	0	0	0	0	0	0	0	0	0	0	0	0	0
Bac_44RR28t	7	4	4	11	4	3	0	3	0	1	9	3	4	0	0	1	0	0	4	7	0	1	0	0	1	0	9	0	13	4	4	7	11	16	9	1	0	0	0	0	0	0	0	0	0	0	0	0	0
Bac_47	0	0	0	0	0	0	0	0	0	0	0	0	0	0	0	0	0	0	0	0	0	0	0	0	0	0	1	0	0	0	0	0	0	0	0	0	0	0	0	0	0	0	0	0	0	0	0	0	0
Bac_52A	2	0	1	6	1	2	1	0	0	0	4	0	0	0	0	0	1	0	0	0	1	0	0	0	1	0	4	1	6	1	0	2	6	0	0	2	0	0	0	0	0	0	0	0	0	0	0	0	0
Bac_53	0	6	0	0	0	0	0	0	0	0	0	0	0	0	0	0	0	0	0	0	0	0	0	0	0	0	0	0	0	0	6	0	0	0	0	0	0	0	0	0	0	0	0	0	0	0	0	0	0
Bac_55	0	0	0	0	0	0	0	0	0	0	0	0	0	0	0	0	0	0	0	0	1	0	0	0	0	0	2	0	1	0	0	0	0	1	0	0	0	0	0	0	0	0	0	0	0	0	0	0	0
Bac_66	0	1	0	2	2	0	7	0	0	0	1	0	0	0	0	0	0	1	0	0	0	0	0	0	0	1	24	0	6	0	1	0	2	0	3	0	0	0	0	0	0	0	0	0	0	0	0	0	0
Bac_69	0	0	0	0	0	0	0	0	0	0	1	2	0	0	0	0	0	0	0	0	0	0	0	0	0	0	0	0	1	0	0	0	0	0	0	0	0	0	0	0	0	0	0	0	0	0	0	0	0
Bac_71	0	0	0	1	0	0	1	0	0	0	0	0	0	0	0	0	0	0	3	1	0	0	0	0	0	0	0	0	1	0	0	0	1	0	0	0	0	0	0	0	0	0	0	0	0	0	0	0	0
Bac_77	0	0	1	1	0	0	0	0	0	1	0	0	0	0	0	0	1	0	0	0	2	0	0	0	0	0	1	0	1	1	0	0	1	0	0	2	0	0	0	0	0	0	0	0	0	0	0	0	0
Bac_85	0	1	0	1	0	0	0	1	0	0	1	0	0	0	0	1	0	0	6	3	2	0	0	0	0	0	0	0	1	0	1	0	1	0	0	0	0	0	0	0	0	0	0	0	0	0	0	0	0
Bac_88	1	1	1	3	0	0	0	0	0	0	0	0	0	4	0	0	0	0	1	2	2	0	0	0	1	0	1	0	0	1	1	1	3	1	0	0	0	0	0	0	0	0	0	0	0	0	0	0	0
Bac_92	2	1	0	0	0	0	1	0	0	0	1	0	0	0	0	0	0	0	0	0	0	3	0	0	0	0	3	0	0	0	1	2	0	0	2	1	0	0	0	0	0	0	0	0	0	0	0	0	0
Bac_96	0	3	0	0	0	0	0	1	0	0	2	0	0	0	0	0	0	0	0	0	0	0	0	0	0	0	0	0	2	0	3	0	0	0	1	0	0	0	0	0	0	0	0	0	0	0	0	0	0
Bac_A118	0	2	1	3	3	0	0	0	0	0	2	0	0	1	0	0	1	0	0	0	3	0	0	0	2	0	1	2	10	1	2	0	3	11	0	0	0	0	0	0	0	0	0	0	1	1	0	0	0
Bac_AP205	0	1	0	0	0	0	0	0	0	0	1	0	0	0	0	0	0	0	0	0	0	0	0	0	0	0	0	0	0	0	1	0	0	0	0	0	0	0	0	0	0	1	0	0	0	0	0	0	0
Bac_AP50	0	0	0	3	1	0	0	0	0	0	6	3	1	0	1	0	0	0	0	0	0	0	0	0	0	0	0	0	1	0	0	0	3	0	1	0	0	0	0	0	0	0	0	0	0	0	0	0	0
Bac_APSE2	2	1	0	0	2	0	0	1	0	0	2	0	0	0	0	0	2	0	0	1	0	0	0	0	1	0	0	1	3	0	1	2	0	6	4	253	0	0	0	0	0	0	0	0	0	0	0	0	0
Bac_Aaphi23	1	0	1	4	2	1	2	0	0	1	1	0	1	0	0	0	0	0	3	3	0	0	0	1	0	0	2	0	2	1	0	1	4	7	7	2	0	0	0	0	0	0	0	0	0	0	0	0	0
Bac_Aeh1	1	20	11	13	15	7	4	2	0	0	16	5	5	0	1	3	1	24	10	6	8	2	0	1	2	0	13	0	12	11	20	1	13	18	26	55	0	0	0	0	0	0	0	0	4	0	0	0	9
Bac_B103	0	2	0	2	0	0	0	0	0	0	2	0	0	1	0	0	0	0	0	0	0	0	0	0	1	0	0	0	2	0	2	0	2	0	0	0	0	0	0	0	0	0	0	0	0	0	0	0	0
Bac_B3	33	0	6	1	3	0	1	1	0	0	1	0	2	0	0	0	0	0	3	5	0	0	0	0	0	0	1	0	2	6	0	33	1	3	38	9	0	0	0	0	0	0	0	0	0	0	0	0	0
Bac_B408	0	2	1	6	1	2	1	0	0	0	3	0	0	0	0	0	0	0	1	0	0	0	0	0	0	0	8	0	4	1	2	0	6	7	0	0	0	0	0	0	0	1	0	0	0	0	0	0	0
Bac_Cherry	0	0	0	0	0	0	0	0	0	0	0	0	0	0	0	0	0	0	0	0	0	0	0	0	0	1	0	0	1	0	0	0	0	0	0	0	0	0	0	0	0	0	0	0	0	0	0	0	0
Bac_D3112	1	0	0	0	1	0	0	0	0	0	0	0	0	0	0	0	0	0	0	0	0	0	0	0	0	0	0	0	0	0	0	1	0	0	1	3	0	0	0	0	0	0	0	0	0	0	0	0	0
Bac_EJ1	1	2	2	1	4	0	0	5	0	3	2	2	0	0	1	1	2	0	1	0	0	0	0	0	1	0	2	1	3	2	2	1	1	1	0	0	0	0	0	0	0	0	0	0	0	1	0	0	1
Bac_EW	1	1	3	10	4	10	0	0	0	0	2	2	0	0	1	0	0	0	3	3	3	0	0	0	0	0	9	0	3	3	1	1	10	0	5	2	0	0	0	0	0	0	0	0	0	1	0	0	1
Bac_Felix_01	0	6	0	1	4	0	0	0	0	0	4	4	0	0	0	0	0	0	0	0	2	0	1	1	0	0	8	0	3	0	6	0	1	0	2	0	0	0	0	0	0	0	0	0	0	0	0	0	0
Bac_G1	2	16	10	52	13	6	7	9	0	0	19	8	2	4	0	5	4	3	3	0	7	4	0	1	3	2	58	1	33	10	16	2	52	2	6	3	0	0	0	0	0	4	0	0	1	0	0	0	3
Bac_GA1	0	1	2	6	1	0	2	0	0	0	0	1	0	0	0	0	0	0	0	0	0	0	0	0	1	0	5	1	6	2	1	0	6	0	0	0	0	0	0	0	0	0	0	0	0	0	0	0	0
Bac_HK620	0	0	1	0	2	0	0	1	0	0	1	1	0	0	0	1	0	0	6	6	1	0	0	0	0	0	0	0	1	1	0	0	0	14	14	8	0	0	0	0	0	0	0	0	0	0	0	0	0
Bac_HK97	0	0	0	0	1	0	2	2	0	0	1	0	1	0	0	0	0	0	1	0	1	0	0	0	0	0	0	0	1	0	0	0	0	3	23	23	0	0	0	0	0	0	1	0	0	0	0	0	0
Bac_IEBH	0	7	6	14	5	0	6	2	0	0	2	0	1	1	0	0	0	1	0	1	4	0	0	0	0	5	6	0	10	6	7	0	14	0	5	4	0	0	0	0	0	0	0	0	1	0	0	0	0
Bac_IN93	6	0	2	1	1	0	0	2	0	0	0	1	1	1	2	4	1	0	2	2	0	7	0	0	1	0	1	1	1	2	0	6	1	0	6	1	0	0	0	0	0	0	0	0	0	0	0	0	0
Bac_JK06	0	1	0	1	0	13	0	0	0	0	6	0	0	0	0	0	0	0	2	0	0	0	0	0	1	0	4	1	6	0	1	0	1	1	2	0	0	0	0	0	0	0	0	0	0	0	0	0	0
Bac_KS7	2	0	1	2	0	20	0	0	0	0	4	0	0	0	0	0	0	0	4	7	2	0	0	0	0	0	0	0	1	1	0	2	2	0	0	12	0	0	0	0	0	0	2	0	0	0	0	0	0
Bac_KVP40	7	8	11	11	9	22	7	9	1	1	12	12	6	1	2	0	3	3	9	3	13	3	0	0	3	2	16	1	20	11	8	7	11	2	13	7	0	0	0	0	0	0	0	0	0	0	1	0	1
Bac_L413C	4	2	2	1	0	0	0	0	0	0	1	0	0	0	0	0	0	0	0	0	1	0	0	0	0	0	0	0	0	2	2	4	1	6	0	1	0	0	0	0	0	0	0	0	0	0	0	0	0
Bac_M11	0	0	0	0	1	0	0	0	0	0	1	0	0	0	0	0	0	0	0	0	0	0	0	0	0	0	0	0	0	0	0	0	0	0	0	0	0	0	0	0	0	0	0	0	0	0	0	0	0
Bac_Mx8	31	3	4	0	1	0	0	0	0	0	5	0	2	3	0	0	0	0	13	8	0	0	0	0	0	0	1	0	2	4	3	31	0	0	12	3	0	0	0	0	0	0	0	0	0	0	0	0	0
Bac_N15	4	0	1	1	0	0	0	3	0	0	5	2	1	1	1	0	0	2	5	8	4	0	0	0	0	0	0	0	1	1	0	4	1	56	5	1	0	0	0	0	0	0	0	0	0	0	0	0	0
Bac_Nf	0	0	0	1	3	1	0	0	0	0	2	0	1	0	0	0	0	0	0	0	0	0	0	0	0	0	3	0	1	0	0	0	1	0	0	1	0	0	0	0	0	0	0	0	0	0	0	0	0
Bac_P27	1	3	1	1	2	0	1	0	0	0	9	0	0	1	2	3	0	0	1	1	0	0	0	0	1	0	1	0	1	1	3	1	1	5	1	1	0	0	0	0	0	0	0	0	0	0	0	0	0
Bac_P4	7	0	0	1	0	0	0	0	0	1	2	0	0	0	0	0	0	0	0	0	0	0	0	0	0	0	1	0	1	0	0	7	1	0	12	1	0	0	0	0	0	0	0	0	0	0	0	0	0
Bac_PSP3	4	0	1	1	1	1	1	0	0	0	0	0	0	0	0	0	0	0	0	0	0	2	0	1	1	0	0	1	0	1	0	4	1	3	1	1	0	0	0	0	0	0	0	0	0	0	0	0	0
Bac_PT1028	3	2	4	2	0	0	3	0	0	0	1	1	1	3	0	1	0	0	0	0	1	0	0	0	1	0	8	0	2	4	2	3	2	0	0	0	0	0	0	0	0	0	0	0	0	0	0	0	0
Bac_PY54	1	2	1	2	2	3	0	0	0	0	0	4	1	0	0	0	0	0	0	0	1	0	0	0	1	0	0	1	6	1	2	1	2	1	0	1	0	0	0	0	0	0	0	0	0	1	0	0	0
Bac_RM_378	20	1	5	2	6	1	1	2	0	0	3	3	2	0	0	3	1	4	6	8	3	0	3	0	1	0	8	1	8	5	1	20	2	4	8	2	0	0	0	0	0	0	0	0	1	0	0	0	0
Bac_ROSA	0	1	3	2	1	0	0	0	0	0	0	0	0	0	0	0	0	0	0	0	0	0	0	0	0	0	0	0	1	3	1	0	2	0	0	0	0	0	0	0	0	0	0	0	0	0	0	0	0
Bac_SH1	11	1	1	1	2	0	0	6	0	0	5	2	0	0	0	0	0	0	7	10	0	1	0	0	0	0	0	0	0	1	1	11	1	0	8	27	0	0	0	0	0	0	0	0	0	0	0	0	0
Bac_SPBc2	5	9	5	19	7	8	4	3	0	2	7	4	4	1	0	7	0	1	1	1	2	3	0	0	7	0	36	5	30	5	9	5	19	4	2	6	0	0	0	0	0	0	0	0	0	1	0	0	0
Bac_SPM2	27	58	21	127	22	12	2	9	0	1	36	26	9	12	3	3	5	0	14	12	11	6	0	0	2	1	25	1	41	21	58	27	127	20	11	14	0	0	0	0	0	3	0	0	0	0	0	0	0
Bac_SPO1	1	7	4	11	7	29	0	2	0	0	0	7	0	0	0	0	1	0	2	2	1	2	0	1	2	0	18	1	16	4	7	1	11	1	3	0	0	0	0	0	0	0	0	0	0	0	1	0	1
Bac_SPP1	3	3	3	4	0	0	1	0	0	0	1	1	0	0	1	0	0	1	2	1	0	2	0	0	1	0	2	1	2	3	3	3	4	0	0	1	0	0	0	0	0	0	0	0	0	0	0	0	0
Bac_T3	13	3	4	2	0	2	0	0	1	0	4	2	0	0	0	0	1	1	0	1	0	1	48	187	0	0	0	0	0	4	3	13	2	4	0	1	0	0	0	0	0	0	0	0	0	0	0	0	0
Bac_T5	9	8	2	9	6	7	3	2	0	1	6	4	0	1	0	1	0	0	0	1	4	0	0	0	2	0	10	2	7	2	8	9	9	0	7	1	0	0	0	0	0	0	0	0	0	0	0	0	0
Bac_TP21L	0	6	2	2	2	0	0	0	0	0	2	5	1	0	0	0	1	0	1	0	2	0	0	0	0	0	1	0	5	2	6	0	2	1	6	0	0	0	0	0	0	0	0	1	0	0	0	0	0
Bac_Tuc2009	6	6	4	4	10	15	0	0	0	0	3	2	0	0	0	2	0	0	6	0	2	0	0	0	0	0	4	0	6	4	6	6	4	1	3	1	0	0	0	0	0	0	0	0	0	7	1	0	0
Bac_VSKK	0	0	0	0	0	0	0	0	0	0	0	0	0	0	0	0	0	0	0	0	0	0	0	0	0	0	0	0	0	0	0	0	0	102	0	0	0	0	0	0	0	0	0	0	0	0	0	0	0
Bac_VT2Sa	0	0	0	0	0	0	0	0	0	0	0	0	0	0	0	0	0	0	0	0	0	0	0	0	0	0	0	0	0	0	0	0	0	0	2	0	0	0	0	0	0	0	0	0	0	0	0	0	0
Bac_VWB	48	10	16	0	4	0	0	8	1	0	6	1	2	0	3	1	1	1	9	9	0	0	0	0	0	0	0	0	1	16	10	48	0	0	6	13	0	0	0	0	0	0	0	0	0	0	0	0	0
Bac_Vf12	1	0	0	5	0	0	0	0	0	0	0	1	0	0	0	0	0	0	0	0	0	0	0	0	0	0	2	0	1	0	0	1	5	1	0	0	0	0	0	0	0	0	0	0	0	0	0	0	0
Bac_VfO3K6	0	1	0	0	0	0	0	0	0	0	0	3	0	0	0	1	0	0	0	0	0	0	0	0	0	0	2	0	0	0	1	0	0	0	0	0	0	0	0	0	0	0	0	0	0	0	0	0	0
Bac_WBeta	0	6	3	6	7	0	0	3	0	0	2	2	0	0	0	0	1	0	1	1	5	0	0	0	0	0	12	0	10	3	6	0	6	0	2	0	0	0	0	0	0	0	0	0	0	0	0	0	0
Bac_WPhi	0	0	0	1	0	0	2	0	0	0	0	0	0	0	0	0	1	0	0	0	0	0	0	0	0	0	2	0	0	0	0	0	1	2	0	0	0	0	0	0	0	0	0	0	0	0	0	0	0
Bac_X2	0	3	0	2	2	1	1	1	0	0	1	2	0	0	0	0	0	1	5	4	1	0	0	0	1	0	2	1	5	0	3	0	2	2	2	0	0	0	0	0	0	0	0	0	1	1	0	0	0
Bac_bIL170	0	0	0	7	0	0	0	0	0	0	1	1	0	0	0	0	0	0	0	0	0	0	0	0	0	0	2	0	2	0	0	0	7	0	2	0	0	0	0	0	0	0	0	0	0	18	0	0	1
Bac_bIL285	0	0	0	4	3	0	0	3	0	0	0	3	0	0	0	0	0	0	3	4	23	0	1	0	3	1	0	2	8	0	0	0	4	1	1	0	0	0	0	0	0	0	0	0	0	0	0	0	0
Bac_bIL286	0	3	1	7	5	3	0	0	0	1	2	1	0	0	3	0	0	0	1	2	0	0	0	0	0	0	3	0	3	1	3	0	7	1	1	0	0	0	0	0	0	0	0	0	0	0	0	0	0
Bac_bIL309	1	6	1	9	5	180	2	1	0	0	3	2	0	0	0	0	0	0	2	0	3	0	0	0	0	2	5	0	12	1	6	1	9	0	3	3	0	0	0	0	0	0	0	0	0	0	0	0	0
Bac_bIL310	0	2	0	5	0	0	0	1	0	0	1	1	0	0	0	0	0	0	0	0	1	0	0	0	0	0	2	0	8	0	2	0	5	1	0	0	0	0	0	0	0	0	0	0	0	0	0	0	1
Bac_bIL311	0	2	1	3	0	0	0	0	0	0	0	0	1	3	0	0	0	0	2	9	3	0	0	4	1	0	2	0	4	1	2	0	3	8	6	1	0	0	0	0	0	0	0	0	1	0	0	0	0
Bac_bIL312	0	0	1	4	0	0	0	1	0	0	0	0	0	1	0	0	1	0	5	3	6	1	0	0	0	1	1	0	5	1	0	0	4	2	0	0	0	0	0	0	0	0	0	0	0	0	0	0	0
Bac_clarkii_BCJA1c	0	1	3	2	2	43	0	0	0	0	2	3	0	0	0	0	0	0	4	1	1	0	0	0	0	4	6	0	2	3	1	0	2	3	1	0	0	0	0	0	0	0	0	0	0	1	0	0	0
Bac_lambda	3	0	3	1	0	0	0	1	2	0	1	0	0	0	0	1	0	0	0	0	2	0	3	0	1	0	0	0	1	3	0	3	1	42	551	83	0	0	0	0	0	0	0	0	0	0	0	0	1
Bac_phBC6A51	0	5	0	10	5	1	0	1	1	0	0	1	1	1	2	3	1	0	0	1	3	0	0	0	2	0	17	1	13	0	5	0	10	0	5	1	0	0	0	0	0	0	0	0	1	0	0	0	0
Bac_phBC6A52	0	5	1	6	0	1	1	0	5	0	2	2	2	0	0	0	2	0	1	1	0	15	0	0	0	1	3	0	11	1	5	0	6	1	0	1	0	0	0	0	0	0	0	0	0	2	0	0	0
Bac_phi1026b	42	15	7	1	6	0	0	6	0	0	4	1	1	0	1	0	0	0	12	14	0	1	0	2	0	0	0	0	0	7	15	42	1	2	17	4	0	0	0	0	0	0	0	0	0	0	0	0	0
Bac_phi105	2	2	1	2	0	1	0	0	0	0	0	0	1	3	1	0	0	0	2	0	3	0	0	0	1	0	3	1	3	1	2	2	2	1	3	0	0	0	0	0	0	0	0	0	0	0	0	0	0
Bac_phi12	2	0	0	0	2	0	0	1	0	0	0	0	0	0	0	0	0	0	0	0	0	0	0	0	0	0	2	0	0	0	0	2	0	0	0	0	0	0	0	0	0	0	0	0	0	0	0	0	0
Bac_phi29	1	2	0	0	0	0	0	1	0	0	1	0	0	0	0	0	0	0	0	0	0	0	0	0	0	3	4	0	0	0	2	1	0	0	0	0	0	0	0	0	0	8	0	0	0	0	1	0	0
Bac_phi3626	1	3	4	6	8	22	2	2	0	0	4	6	4	1	1	1	1	0	1	2	1	0	0	2	2	1	8	1	15	4	3	1	6	2	0	2	0	0	0	0	0	0	0	0	1	0	0	0	0
Bac_phi8	0	1	0	0	0	0	0	0	0	0	1	0	0	0	0	0	0	0	0	1	0	0	0	0	0	0	1	0	0	0	1	0	0	1	0	0	0	0	0	0	0	0	0	0	0	0	0	0	0
Bac_phiBT1	7	1	3	0	1	0	0	3	0	0	3	0	0	0	0	0	1	0	1	5	0	2	0	0	0	0	0	0	0	3	1	7	0	2	6	2	0	0	0	0	0	0	0	0	0	0	0	0	0
Bac_phiC31	8	0	0	0	0	6	0	4	0	0	4	0	1	1	0	1	0	0	3	0	1	0	0	0	0	0	1	0	0	0	0	8	0	3	11	11	0	0	0	0	0	0	0	0	0	1	0	0	1
Bac_phiE125	22	5	1	0	4	0	0	3	0	0	3	0	0	0	1	1	0	0	16	15	2	0	0	0	0	0	0	0	0	1	5	22	0	5	1	3	0	0	0	0	0	0	0	0	0	0	0	0	0
Bac_phiKO2	3	1	0	0	0	1	0	0	0	0	1	1	2	0	0	2	1	0	8	1	1	0	3	0	0	0	2	0	2	0	1	3	0	12	13	5	0	0	0	0	0	0	0	0	0	0	0	0	0
Bac_phiMFV1	0	0	0	7	3	0	1	0	0	0	3	2	0	1	0	0	0	0	3	3	6	0	1	0	1	1	12	0	11	0	0	0	7	1	6	0	0	0	0	0	0	0	0	0	0	0	0	0	0
Bac_phiYeO312	0	1	0	0	0	0	0	0	0	0	1	1	0	0	0	0	0	0	0	0	0	0	0	0	0	0	1	0	0	0	1	0	0	2	0	0	0	0	0	0	0	0	0	0	0	0	0	0	0
Bac_phi_AT3	0	0	0	1	5	0	0	4	0	0	5	1	0	0	0	0	0	0	0	0	0	1	0	0	2	0	2	2	3	0	0	0	1	3	0	1	0	0	0	0	0	0	0	0	0	0	0	0	0
Bac_phi_CTX	22	2	4	0	2	1	1	1	0	0	2	0	0	0	0	1	0	0	4	1	1	2	0	0	0	0	0	0	1	4	2	22	0	28	21	97	0	0	0	0	0	0	0	0	0	0	0	0	0
Bac_phi_ETA	0	0	0	2	4	0	0	0	0	0	2	1	0	0	0	0	0	0	2	0	0	0	0	0	0	0	0	0	0	0	0	0	2	0	0	0	0	0	0	0	0	0	0	0	0	0	0	0	0
Bac_phi_JL001	9	6	3	0	2	1	0	2	0	1	8	0	1	1	1	2	1	3	6	5	0	0	0	0	0	0	1	0	0	3	6	9	0	0	2	157	0	0	0	0	0	0	0	0	0	0	0	0	0
Bac_phi_LC3	0	2	1	2	1	72	0	0	0	0	1	0	0	0	0	0	0	0	0	0	2	0	0	0	0	0	3	0	2	1	2	0	2	0	2	1	0	0	0	0	0	0	0	0	0	0	0	0	0
Bac_phig1e	0	0	0	2	1	0	0	0	0	0	0	0	0	0	0	0	0	0	1	1	1	0	0	0	0	0	2	0	4	0	0	0	2	0	0	1	0	0	0	0	0	1	0	0	0	0	0	0	0
Bac_r1t	0	3	0	3	5	3	0	0	0	0	5	1	1	0	1	0	2	0	0	0	0	0	0	0	0	1	4	0	10	0	3	0	3	1	1	0	0	0	0	0	0	0	0	0	0	3	0	0	2
Bac_sk1	0	0	0	2	1	0	0	0	0	0	1	0	0	0	0	0	0	0	0	0	0	0	0	0	0	0	2	0	1	0	0	0	2	0	0	0	0	0	0	0	0	0	0	0	0	8	1	0	0
Bac_thuringiensis_Bam35c	0	0	1	1	1	0	0	0	0	0	0	0	0	0	0	0	0	0	0	0	1	0	0	0	0	0	2	0	3	1	0	0	1	0	0	0	0	0	0	0	0	0	0	0	0	0	0	0	0
Bac_thuringiensis_GIL16c	0	0	0	0	0	0	0	0	0	0	1	0	0	0	0	0	0	0	0	0	0	0	0	1	1	0	1	1	1	0	0	0	0	0	0	0	0	0	0	0	0	0	0	0	0	0	0	0	0
Bac_virus_1	1	1	0	1	0	0	0	0	0	0	0	0	0	0	0	0	1	0	0	1	1	1	0	0	0	0	3	0	2	0	1	1	1	1	0	0	0	0	0	0	0	0	0	0	0	3	0	0	0
Bor_BIP1	0	0	0	0	0	0	0	0	0	0	0	0	0	0	0	0	0	0	1	2	0	0	0	0	0	0	0	0	0	0	0	0	0	0	0	0	0	0	0	0	0	0	0	0	0	0	0	0	0
Bor_BMP1	0	2	0	0	0	0	0	0	0	0	0	0	0	0	0	0	0	0	0	0	0	0	0	0	0	0	0	0	0	0	2	0	0	0	0	0	0	0	0	0	0	0	0	0	0	0	0	0	0
Bor_BPP1	48	5	5	0	3	69	0	7	1	0	22	5	1	5	6	7	6	8	31	27	2	2	0	0	0	0	1	0	3	5	5	48	0	0	17	14	0	0	0	0	0	0	0	0	0	0	0	0	1
Bur_Bcep176	27	4	3	1	0	0	0	0	0	0	6	0	1	0	0	0	0	0	7	14	1	0	1	0	0	0	0	0	1	3	4	27	1	1	3	2	0	0	0	0	0	0	0	0	0	0	0	0	1
Bur_BcepGomr	17	5	7	1	5	0	0	1	0	0	3	0	1	0	0	1	2	0	3	0	1	1	0	0	0	0	0	0	2	7	5	17	1	2	0	2	0	0	0	0	0	0	0	0	0	0	0	0	0
Bur_BcepIL02	96	14	19	1	4	2	0	3	0	0	11	1	1	0	1	0	0	4	8	12	0	0	0	0	0	0	0	0	0	19	14	96	1	9	18	8	0	0	0	0	0	0	0	0	0	0	0	0	1
Bur_BcepNY3	19	0	2	0	0	1	0	2	0	0	4	0	4	0	0	0	0	0	0	4	0	0	0	0	0	0	0	0	0	2	0	19	0	2	1	3	0	0	0	0	0	0	0	0	0	0	0	0	0
Bur_KS10	33	1	5	0	3	0	2	2	0	0	3	0	0	0	0	0	0	0	2	3	0	0	0	0	0	0	1	0	1	5	1	33	0	0	9	2	0	0	0	0	0	0	0	0	0	0	0	0	0
Bur_KS9	9	1	1	0	0	0	0	2	0	0	2	1	0	0	1	0	0	1	7	12	3	0	0	0	0	0	0	0	0	1	1	9	0	1	13	7	0	0	0	0	0	0	0	0	0	0	0	0	0
Bur_ambifaria_BcepF1	21	1	6	0	2	0	0	1	0	0	6	0	0	1	0	0	0	0	6	4	5	0	0	0	0	0	0	0	1	6	1	21	0	2	9	0	0	0	0	0	0	0	0	0	0	0	0	0	0
Bur_cenocepacia_BcepB1A	13	3	3	0	1	0	0	1	0	1	12	0	1	0	2	2	0	1	0	4	0	1	0	0	0	0	0	0	0	3	3	13	0	5	1	1	0	0	0	0	0	0	0	0	0	0	0	0	0
Bur_cenocepacia_BcepMu	44	5	8	17	4	0	0	3	0	0	1	0	1	0	0	0	0	0	5	11	0	1	0	0	1	0	2	1	1	8	5	44	17	0	7	5	0	0	0	0	0	0	0	0	0	0	0	0	0
Bur_cepacia_Bcep1	17	2	0	0	0	0	0	3	0	0	3	0	0	0	0	1	0	0	8	8	1	0	0	0	0	0	0	0	1	0	2	17	0	1	0	0	0	0	0	0	0	0	0	0	0	0	0	0	0
Bur_cepacia_Bcep22	101	20	14	1	10	57	0	7	0	20	12	4	1	0	1	3	2	2	18	17	3	1	0	0	0	0	0	0	0	14	20	101	1	3	35	6	0	0	0	0	0	0	0	0	0	0	0	0	0
Bur_cepacia_Bcep43	22	4	10	2	0	4	0	1	0	0	0	2	2	3	0	0	1	0	13	13	2	1	0	1	0	0	0	0	0	10	4	22	2	0	15	3	0	0	0	0	0	0	0	0	0	6	0	0	0
Bur_cepacia_Bcep781	24	3	3	4	3	0	0	1	0	0	7	0	1	0	0	0	1	0	1	3	0	10	1	0	0	0	0	0	0	3	3	24	4	3	9	4	0	0	0	0	0	0	0	0	0	0	0	0	1
Bur_cepacia_BcepC6B	52	6	7	2	5	3	0	3	0	0	9	0	3	1	0	1	3	5	56	54	4	0	0	0	0	0	0	0	0	7	6	52	2	5	24	8	0	0	0	0	0	0	0	0	0	0	0	0	1
Bur_cepacia_BcepNazgul	35	1	6	0	1	51	0	7	0	0	3	0	2	0	0	0	0	0	5	10	0	3	0	0	1	0	0	1	0	6	1	35	0	0	4	0	0	0	0	0	0	0	0	0	0	0	0	0	1
Bur_phi6442	12	1	1	4	0	5	0	0	0	0	2	0	0	0	0	3	0	0	2	6	2	0	0	0	0	0	0	0	2	1	1	12	4	5	8	6	0	0	0	0	0	0	0	0	0	0	0	0	0
Bur_phiE122	16	3	0	0	2	0	2	2	0	0	2	1	0	1	0	0	0	0	2	1	0	0	0	0	0	0	0	0	1	0	3	16	0	1	0	10	0	0	0	0	0	0	0	0	0	1	0	0	0
Bur_phiE202	69	3	11	0	0	1	0	3	0	1	7	3	1	0	1	1	0	2	7	2	5	1	0	0	0	0	0	0	1	11	3	69	0	4	19	2	0	0	0	0	0	0	0	0	0	0	0	0	0
Bur_phiE255	11	0	3	0	0	0	0	1	0	0	5	0	0	1	0	3	0	0	9	5	1	0	0	0	0	0	0	0	1	3	0	11	0	3	10	7	0	0	0	0	0	0	0	0	0	0	0	0	1
Bur_pseudomallei_phi52237	2	0	0	2	0	0	0	4	0	0	0	0	0	0	1	1	1	0	0	5	0	0	0	0	0	0	0	0	0	0	0	2	2	1	1	0	0	0	0	0	3	0	0	0	0	0	0	0	0
Chl_2	0	0	0	61	0	0	1	0	0	0	0	0	0	0	0	0	0	0	0	1	0	0	0	0	1	0	0	1	0	0	0	0	61	0	0	0	0	0	0	0	0	0	0	0	0	0	0	0	0
Chl_3	0	1	0	0	0	0	3	0	0	0	0	0	0	0	0	0	0	0	0	0	0	0	0	0	0	0	0	0	0	0	1	0	0	0	0	0	0	0	0	0	0	0	0	0	0	0	0	0	0
Chl_4	0	0	0	64	0	0	4	0	0	0	0	0	0	0	0	0	0	0	0	46	1	0	0	0	0	0	0	0	0	0	0	0	64	0	0	0	0	0	0	0	0	0	0	0	0	0	0	0	0
Chl_Chp1	0	5	2	4	56	0	2	0	0	0	0	0	0	2	0	0	1	0	0	69	1	0	0	0	0	0	1	0	2	2	5	0	4	0	0	0	0	0	1	0	0	0	0	0	0	0	1	0	0
Chl_PhiCPG1	0	2	0	31	1	0	17	0	0	0	0	0	0	0	0	0	0	0	0	6	0	0	0	0	0	0	0	0	0	0	2	0	31	0	0	0	0	0	0	0	0	0	0	0	0	0	1	0	0
Chl_phiCPAR39	0	3	0	0	0	0	0	0	0	0	0	0	0	0	0	0	0	0	0	1	0	0	0	0	0	0	0	0	2	0	3	0	0	0	0	0	0	0	0	0	0	0	0	0	0	0	0	0	0
Cla_CMP1	12	4	4	1	2	0	0	3	0	0	1	0	0	0	1	0	0	0	2	8	0	4	0	0	0	0	0	0	1	4	4	12	1	0	4	13	0	0	0	0	0	0	0	0	0	0	0	0	0
Clo_39O	8	6	8	13	12	177	3	0	0	0	5	1	1	1	0	0	4	0	2	3	2	0	0	0	0	0	9	0	6	8	6	8	13	2	0	0	0	0	0	0	0	0	0	0	0	1	0	0	0
Clo_D1873	15	3	3	2	3	0	1	0	0	0	0	1	1	0	1	1	0	0	1	3	1	1	0	0	3	0	3	1	8	3	3	15	2	3	0	2	0	0	0	0	0	0	0	0	0	0	0	0	0
Clo_cst	13	31	19	66	32	51	10	4	0	1	29	15	6	6	0	9	8	8	5	7	11	6	0	0	5	11	75	3	84	19	31	13	66	6	13	4	0	0	0	0	0	2	0	0	1	0	1	0	3
Clo_phiC2	1	5	1	19	5	0	7	2	0	0	3	2	0	0	0	3	0	0	2	0	5	0	1	0	2	0	17	2	13	1	5	1	19	0	1	2	0	0	0	0	0	0	0	0	0	0	0	0	1
Clo_phiCD27	1	4	1	14	4	13	6	1	0	1	3	2	1	0	1	1	0	0	4	3	3	3	0	0	1	1	8	1	21	1	4	1	14	1	11	0	0	0	0	0	0	0	0	0	0	0	0	0	2
Clo_phiSM101	1	11	3	51	7	2	1	0	0	0	3	4	3	0	0	2	0	2	2	2	2	1	0	0	3	0	17	2	21	3	11	1	51	1	1	0	5	0	0	1	0	21	0	25	44	1	20	0	29
Clo_phi_CD119	1	20	9	34	4	1	4	0	0	0	5	12	4	0	0	0	1	1	4	4	9	0	0	1	2	0	39	1	18	9	20	1	34	4	0	0	1	0	0	0	0	0	0	0	0	0	0	0	1
Col_alpha3	0	0	0	1	0	0	0	0	0	0	0	0	0	0	0	0	0	0	0	0	0	0	0	0	0	0	0	0	0	0	0	0	1	0	0	0	0	0	0	0	0	0	0	0	0	0	0	0	0
Col_phiX174	0	0	0	1	0	0	0	0	0	0	0	0	1	0	0	0	0	0	0	0	0	0	0	0	0	0	0	0	0	0	0	0	1	0	0	0	0	0	0	0	0	0	0	0	0	0	0	0	0
Cor_BFK20	7	2	0	0	0	1	0	0	0	0	3	1	0	1	0	0	0	0	3	1	1	0	0	0	0	0	1	0	0	0	2	7	0	0	0	1	0	0	0	0	0	0	0	0	0	0	0	0	0
Cor_P1201	4	7	1	4	0	1	0	2	0	0	5	0	1	2	1	1	1	0	11	19	1	0	0	0	1	0	7	0	4	1	7	4	4	4	3	0	0	0	0	0	0	0	0	0	0	18	5	0	1
Cya_P60	6	3	3	10	2	0	0	0	0	0	1	1	0	2	2	0	0	0	1	0	1	0	0	0	0	1	2	0	1	3	3	6	10	0	2	0	0	0	0	0	0	0	0	0	0	0	0	0	1
Cya_PSS2	5	4	1	7	1	1	2	3	0	1	6	2	0	0	0	0	2	0	4	14	1	1	0	0	1	0	3	0	1	1	4	5	7	3	16	3	0	0	0	0	0	0	0	0	0	0	0	0	0
Cya_PSSM2	6	122	57	958	26	11	6	7	0	1	41	67	22	8	10	4	4	4	13	5	6	253	1	0	3	3	30	1	42	57	122	6	958	1146	8	1142	0	0	0	1	0	7	2	2	0	1	1	0	13
Cya_PSSP7	6	7	6	810	7	0	2	2	0	0	4	4	1	1	1	0	0	0	0	1	1	0	0	0	1	0	5	0	10	6	7	6	810	2	2	3	0	0	0	0	0	0	0	0	0	0	0	0	0
Def_phiW14	17	9	8	3	3	2	2	4	0	0	4	1	0	0	0	0	1	0	10	3	1	2	0	0	0	0	1	0	1	8	9	17	3	4	21	8	0	0	0	0	0	0	0	0	0	0	0	0	1
End_APSE1	0	1	1	0	0	0	0	0	0	0	0	0	0	0	0	0	0	0	0	0	0	0	0	0	0	0	0	0	1	1	1	0	0	0	0	111	0	0	0	0	0	0	0	0	0	0	0	0	0
Ent_13a	0	0	0	0	1	2	0	1	0	0	1	0	1	0	0	0	0	0	1	0	0	0	58	190	0	0	0	0	0	0	0	0	0	0	0	0	0	0	0	0	0	0	0	0	0	0	0	0	0
Ent_186	5	3	2	1	0	0	0	0	0	0	2	0	0	0	0	2	0	1	1	1	0	0	0	0	0	0	1	0	0	2	3	5	1	23	16	1	0	0	0	0	0	0	0	0	0	0	0	0	0
Ent_2851	0	0	1	0	0	0	0	0	0	0	0	0	0	0	0	0	0	0	0	0	0	0	0	0	0	0	0	0	0	1	0	0	0	0	2	1	0	0	0	0	0	0	0	0	0	0	0	0	0
Ent_BA14	0	1	0	1	0	0	0	1	0	0	0	1	2	0	0	0	0	0	0	0	0	0	0	0	0	1	1	0	2	0	1	0	1	4	6	0	0	0	0	0	0	0	0	0	0	0	0	0	0
Ent_DE3	0	0	1	1	0	0	0	0	0	0	0	0	0	0	1	0	0	0	0	0	0	0	7	5	0	0	0	0	0	1	0	0	1	3	68	10	0	0	0	0	0	0	0	0	0	0	0	0	0
Ent_EFAP1	1	2	1	6	2	0	0	1	0	0	2	0	0	0	0	0	0	0	2	1	0	0	0	0	1	0	0	0	1	1	2	1	6	4	0	0	0	1	0	0	1	0	0	0	0	0	0	0	0
Ent_EPS7	0	7	3	12	13	6	2	7	0	1	6	1	2	0	2	0	0	0	6	2	5	6	0	0	1	0	8	0	9	3	7	0	12	6	6	4	0	0	0	0	0	17	1	0	0	2	0	0	2
Ent_EcoDS1	1	1	0	4	0	0	0	0	0	0	5	2	2	0	1	0	0	0	3	1	0	0	0	0	0	0	1	0	0	0	1	1	4	2	1	0	0	0	0	0	0	0	1	0	0	0	0	0	0
Ent_FI	0	0	0	0	0	0	0	0	0	0	0	0	0	0	0	0	0	0	0	0	0	0	0	0	0	0	2	0	0	0	0	0	0	0	0	0	0	0	0	0	0	0	0	0	0	0	0	0	0
Ent_FI_sensu_lato	0	0	0	0	0	0	0	2	0	0	0	0	0	0	0	0	0	0	0	0	0	0	0	0	0	0	0	0	0	0	0	0	0	0	0	0	0	0	0	0	0	0	0	0	0	0	0	0	0
Ent_Fels2	3	1	0	1	0	0	1	3	0	0	1	2	0	0	0	0	1	0	2	2	1	0	0	0	0	0	1	0	1	0	1	3	1	31	2	4	0	0	0	0	0	0	0	0	0	0	0	0	0
Ent_G4_ID2	0	0	1	0	0	0	0	0	0	0	0	0	0	0	0	0	0	0	0	0	0	0	0	0	0	0	1	0	2	1	0	0	0	0	0	0	0	0	0	0	0	0	0	0	0	0	0	0	0
Ent_HK022	0	2	2	1	2	0	0	0	0	0	0	0	0	1	0	0	1	0	5	0	1	1	0	0	0	0	0	0	1	2	2	0	1	1	20	4	0	0	0	0	0	0	0	0	0	0	0	0	0
Ent_I22	0	0	1	0	0	1	0	0	0	0	0	0	0	0	1	0	0	0	0	1	0	0	0	0	0	0	0	0	1	1	0	0	0	2	0	0	0	0	0	0	0	0	0	0	0	0	0	0	0
Ent_ID18_sensu_lato	0	0	0	0	0	0	0	0	0	0	0	0	0	0	0	0	0	0	0	0	0	0	0	0	0	0	0	0	0	0	0	0	0	0	0	0	0	0	0	0	0	0	0	0	0	0	0	0	0
Ent_ID21	0	0	0	0	0	0	0	0	0	0	0	0	0	0	0	0	0	0	0	0	0	0	0	0	0	0	0	0	0	0	0	0	0	0	0	0	0	0	0	0	0	0	0	0	0	0	0	0	0
Ent_ID22	0	0	0	0	0	0	0	0	0	0	0	0	0	0	0	0	0	0	0	0	0	0	0	0	0	0	0	0	0	0	0	0	0	0	0	0	0	0	0	0	0	0	0	0	0	0	0	0	0
Ent_ID32	0	0	0	0	0	0	0	0	0	0	0	0	0	0	0	0	0	0	0	0	0	0	0	0	1	0	0	0	1	0	0	0	0	0	5	0	0	0	0	0	0	0	0	0	0	0	0	0	0
Ent_ID62	0	0	0	0	0	0	0	0	0	0	0	0	0	0	0	0	0	0	0	0	0	0	0	0	0	0	0	0	1	0	0	0	0	0	0	0	0	0	0	0	0	0	0	0	0	0	0	0	0
Ent_ID8	0	0	0	0	0	0	0	0	0	0	0	0	0	0	0	2	0	0	0	0	0	0	0	0	0	0	0	0	0	0	0	0	0	0	0	0	0	0	0	0	0	0	0	0	0	0	0	0	0
Ent_If1	0	2	0	0	0	1	0	0	0	0	0	0	0	0	0	0	0	0	0	0	0	0	0	0	0	0	0	0	0	0	2	0	0	47	0	1	0	0	0	0	0	0	0	0	0	0	0	0	0
Ent_Ike	0	1	0	2	0	26	0	0	0	0	1	0	0	0	0	0	0	0	0	0	0	0	0	1	0	0	0	0	0	0	1	0	2	52	1	1	0	0	0	0	0	0	0	0	0	0	0	0	0
Ent_JS10	7	9	8	18	4	11	3	0	0	1	13	5	2	3	3	2	3	0	9	8	3	2	0	0	3	0	12	3	16	8	9	7	18	9	8	3	0	0	0	0	0	1	0	0	0	0	0	0	1
Ent_JS98	1	3	1	6	4	0	2	0	0	0	0	1	0	0	0	0	0	0	1	0	0	0	0	0	0	0	3	0	4	1	3	1	6	1	0	0	0	0	0	0	0	0	0	0	0	0	0	0	0
Ent_JSE	2	20	5	9	9	69	15	0	0	0	7	5	4	2	3	1	0	0	7	4	10	1	1	0	3	5	15	0	13	5	20	2	9	4	10	4	0	0	0	0	0	0	0	0	0	0	0	0	1
Ent_K15	3	4	2	5	0	4	0	0	1	0	2	0	1	0	0	0	0	0	1	0	1	0	0	1	0	0	2	0	2	2	4	3	5	7	3	0	0	0	0	0	0	0	0	0	0	0	0	0	1
Ent_K1E	0	0	1	1	1	0	0	0	0	1	2	0	0	1	0	0	0	0	6	1	0	0	0	0	0	0	3	0	1	1	0	0	1	0	1	0	0	0	0	0	0	0	0	0	0	0	0	0	1
Ent_K1F	1	0	0	0	0	0	0	0	0	0	1	1	0	0	0	0	0	0	0	0	1	0	0	0	0	0	0	0	0	0	0	1	0	5	0	0	0	15	0	0	0	0	0	0	0	0	1	1	0
Ent_L17	0	0	0	0	1	0	0	0	0	0	0	0	0	0	0	0	0	0	0	0	0	0	0	0	0	0	0	0	0	0	0	0	0	0	0	0	0	0	0	0	0	0	0	0	0	0	0	0	0
Ent_M13	1	1	0	0	0	0	0	0	0	1	0	0	0	0	0	0	0	0	0	0	0	0	0	32	0	0	0	0	0	0	1	1	0	11	20	9	0	0	0	0	0	0	0	0	0	0	0	0	0
Ent_MS2	0	0	1	0	0	0	0	0	0	0	0	0	0	0	0	0	0	0	0	0	0	0	0	0	0	0	0	0	0	1	0	0	0	0	0	0	0	0	0	0	0	0	0	0	0	0	0	0	0
Ent_Min27	0	0	0	0	0	0	0	0	0	0	1	0	0	0	0	0	0	0	1	1	0	0	0	0	0	0	0	0	0	0	0	0	0	0	7	0	0	0	0	0	0	0	0	0	0	0	0	0	0
Ent_Mu	0	9	0	0	0	0	0	0	0	0	0	0	0	0	0	0	0	0	0	1	0	0	0	0	0	0	0	0	1	0	9	0	0	1	1	1	0	0	0	0	0	0	0	0	0	0	0	0	0
Ent_N4	5	20	3	14	5	0	1	2	0	1	3	3	4	0	1	1	0	1	4	8	4	3	0	0	2	0	1	0	5	3	20	5	14	21	3	3	0	0	0	0	0	1	0	0	0	0	0	0	1
Ent_NC13	0	0	0	0	0	0	0	0	0	0	0	0	0	0	0	0	0	0	0	0	0	0	0	0	0	0	0	0	0	0	0	0	0	0	1	0	0	0	0	0	0	0	0	0	0	0	0	0	0
Ent_NC16	0	0	0	0	2	0	0	0	0	0	0	0	0	0	0	0	0	0	0	0	0	0	0	0	0	0	0	0	0	0	0	0	0	0	0	0	0	0	0	0	0	0	0	0	0	0	0	0	0
Ent_NC19	0	0	0	0	0	0	0	0	0	0	1	0	0	0	0	0	0	0	0	0	0	0	0	0	0	0	0	0	0	0	0	0	0	0	0	0	0	0	0	0	0	0	0	0	0	0	0	0	0
Ent_NC28	0	1	0	1	0	0	0	0	0	0	0	0	0	0	0	0	0	0	0	0	0	0	0	0	0	0	2	0	1	0	1	0	1	0	0	0	0	0	0	0	0	0	0	0	0	0	0	0	0
Ent_NC29	0	0	0	1	0	0	0	0	0	0	0	0	0	0	0	0	0	0	0	0	0	0	0	0	0	0	0	0	0	0	0	0	1	0	0	0	0	0	0	0	0	0	0	0	0	0	0	0	0
Ent_NC35	0	0	0	0	0	0	0	0	0	0	0	0	0	0	0	0	0	0	0	0	0	0	0	0	0	0	0	0	0	0	0	0	0	0	0	0	0	0	0	0	0	0	0	0	0	0	0	0	0
Ent_NC41	0	0	0	1	0	0	0	0	0	0	0	0	0	0	0	0	0	0	0	0	0	0	0	0	0	0	0	0	0	0	0	0	1	0	0	0	0	0	0	0	0	0	0	0	0	0	0	0	0
Ent_NC5	0	0	0	0	0	0	2	0	0	0	0	0	0	0	0	0	0	0	0	0	0	0	0	0	0	0	0	0	0	0	0	0	0	0	0	0	0	0	0	0	0	0	0	0	0	0	0	0	0
Ent_NC51	0	0	0	0	0	0	0	0	0	0	0	0	0	0	0	0	0	0	0	0	0	0	0	0	0	0	0	0	0	0	0	0	0	0	0	0	0	0	0	0	0	0	0	0	0	0	0	0	1
Ent_NC56	0	0	0	4	0	0	0	0	0	0	0	1	0	0	0	0	0	0	0	0	0	1	0	0	0	0	0	0	0	0	0	0	4	0	0	0	0	0	0	0	0	0	0	0	0	0	0	0	0
Ent_NC6	0	0	0	0	1	0	0	0	0	0	0	0	0	0	0	0	0	0	0	0	0	0	0	0	0	0	0	0	0	0	0	0	0	0	0	0	0	0	0	0	0	0	0	0	0	0	0	0	0
Ent_NC7	0	0	0	0	0	0	0	0	0	0	0	0	0	0	0	0	0	0	0	0	0	0	0	0	0	0	0	0	0	0	0	0	0	0	0	0	0	0	0	0	0	0	0	0	0	0	0	0	0
Ent_P1	8	5	3	3	2	20	1	3	0	2	5	0	1	0	0	1	1	1	8	2	2	3	2	1	1	0	3	0	5	3	5	8	3	7	23	5	0	0	0	0	0	1	0	0	0	1	1	0	4
Ent_P2	2	0	0	0	0	0	1	0	0	0	0	0	0	0	0	0	0	0	0	0	0	0	0	0	0	0	1	0	1	0	0	2	0	3	2	0	0	0	0	0	0	0	0	0	0	0	1	0	0
Ent_P22	0	0	0	0	0	0	0	0	0	0	0	0	0	0	0	0	0	0	0	0	0	0	0	0	0	0	0	0	0	0	0	0	0	0	6	0	0	0	0	0	0	0	0	0	0	0	0	0	0
Ent_P7	3	5	10	0	1	1	0	1	0	1	1	1	1	0	0	0	0	0	10	3	0	0	6	2	1	0	2	1	1	10	5	3	0	17	4594	558	0	0	0	0	0	0	0	0	0	0	0	0	0
Ent_PR3	4	1	1	0	2	0	0	0	0	0	1	1	0	1	0	0	0	0	1	1	0	0	0	0	0	0	1	0	0	1	1	4	0	0	2	0	0	0	0	0	0	0	0	0	0	0	0	0	0
Ent_PR4	0	0	0	0	0	0	0	0	0	0	0	0	0	0	0	0	0	0	0	0	0	0	0	0	0	0	0	0	1	0	0	0	0	0	8	0	0	0	0	0	0	0	0	0	0	0	0	0	0
Ent_PR5	1	1	0	1	0	0	0	0	0	0	0	1	0	0	1	0	0	0	0	0	0	0	0	0	0	0	1	0	0	0	1	1	1	0	0	0	0	0	0	0	0	0	0	0	0	0	0	0	0
Ent_PR772	5	0	0	0	1	0	0	3	0	0	2	0	0	1	1	0	0	1	2	0	0	0	0	0	0	0	1	0	1	0	0	5	0	1	3	2	0	0	0	0	0	0	0	0	0	0	0	0	0
Ent_PRD1	0	0	0	0	0	0	0	0	0	0	0	0	0	0	0	0	0	0	0	0	0	0	0	0	0	0	0	0	0	0	0	0	0	0	0	0	0	0	0	0	0	0	0	0	0	0	0	0	0
Ent_Phi1	2	8	2	1	4	0	0	6	0	1	4	2	0	0	1	2	3	7	7	5	3	0	0	0	0	0	8	0	3	2	8	2	1	2	1	3	0	0	0	0	0	0	0	0	0	0	0	0	0
Ent_Qbeta	0	0	0	0	0	0	0	1	0	0	0	0	0	0	0	0	0	0	0	0	0	0	0	0	0	0	0	0	0	0	0	0	0	0	0	0	0	0	0	0	0	0	0	0	0	0	0	0	0
Ent_RB14	5	11	8	14	11	2	2	4	0	1	10	1	1	3	2	0	3	0	6	6	4	1	0	2	1	0	11	1	14	8	11	5	14	4	3	3	0	0	0	0	0	0	0	0	0	0	0	0	1
Ent_RB32	2	4	0	3	1	4	4	0	0	0	3	2	1	0	0	1	0	0	0	5	0	0	0	1	5	3	16	1	18	0	4	2	3	1	0	0	0	0	0	0	0	0	0	0	0	0	0	0	0
Ent_RB49	2	5	0	6	1	13	0	3	0	0	4	4	5	1	4	1	0	0	6	7	18	5	0	0	1	0	7	1	9	0	5	2	6	5	0	2	0	0	0	0	0	0	0	0	0	0	0	0	0
Ent_RB51	2	11	5	17	12	2	3	4	0	3	3	6	2	1	1	1	4	1	1	0	2	0	0	0	1	0	6	1	9	5	11	2	17	14	1	1	0	0	0	0	0	0	0	0	0	1	0	0	0
Ent_RB69	2	7	2	18	3	4	2	0	1	3	9	12	5	0	0	0	0	2	6	7	10	1	0	0	3	0	21	1	6	2	7	2	18	3	2	4	2	0	0	0	0	5	0	8	23	1	5	0	2
Ent_RTP	1	0	1	1	0	1	0	0	0	3	1	0	2	1	0	1	0	0	2	2	1	0	0	0	1	0	1	1	2	1	0	1	1	13	1	21	0	0	0	0	0	0	0	0	0	1	0	0	1
Ent_SP6	0	2	6	2	2	0	0	0	0	0	2	1	0	0	0	2	1	0	0	0	0	0	0	0	0	0	1	0	2	6	2	0	2	0	3	3	0	0	0	0	0	0	0	0	0	0	0	0	0
Ent_SSL2009a	7	3	3	1	9	6	1	1	0	0	3	0	0	2	0	0	0	0	5	6	9	0	0	0	0	0	0	0	3	3	3	7	1	0	1	1	0	0	0	0	0	0	0	0	0	0	0	0	0
Ent_Sf6	0	2	0	0	1	0	0	0	0	0	1	0	1	0	0	0	0	0	4	3	1	0	0	0	0	0	0	0	2	0	2	0	0	2	32	5	0	0	0	0	0	0	0	0	0	0	0	0	0
Ent_St1	0	0	0	0	0	0	0	0	0	0	0	0	0	0	0	0	1	0	0	0	0	0	0	0	0	0	0	0	0	0	0	0	0	0	0	0	0	0	0	0	0	0	0	0	0	0	0	0	0
Ent_T1	14	9	2	1	0	0	0	1	0	0	5	1	1	0	2	3	0	0	2	1	0	0	0	0	1	0	6	0	3	2	9	14	1	28	1	1	0	0	0	0	0	0	0	0	0	0	0	0	0
Ent_T4	8	11	5	30	20	3	2	1	0	3	19	11	5	1	3	2	3	0	3	7	12	2	1	2	2	2	32	1	30	5	11	8	30	9	15	16	0	0	3	1	0	3	0	3	6	0	1	0	0
Ent_T7	0	1	0	2	0	0	0	2	0	0	1	1	0	0	0	0	1	0	0	0	0	0	11	33	0	0	0	0	5	0	1	0	2	6	0	1	0	0	0	0	0	0	0	0	0	0	0	0	0
Ent_TLS	2	2	1	5	5	0	0	0	0	1	3	2	0	0	0	0	1	0	3	6	3	0	0	0	2	5	10	1	2	1	2	2	5	2	9	4	0	0	0	0	0	0	0	0	0	0	0	0	0
Ent_WA10	0	0	0	1	0	0	0	0	0	0	0	0	0	0	0	0	0	0	0	0	0	0	0	0	0	0	0	0	0	0	0	0	1	0	0	0	0	0	0	0	0	0	0	0	0	0	0	0	0
Ent_WA11	0	0	0	0	0	0	0	0	0	0	0	0	0	0	0	0	0	1	0	0	0	0	0	0	0	0	0	0	0	0	0	0	0	0	0	0	0	0	0	0	0	0	0	0	0	0	0	0	0
Ent_WA13_sensu_lato	0	0	0	0	0	0	0	0	0	0	0	0	0	0	0	0	0	0	0	0	0	0	0	0	0	0	0	0	0	0	0	0	0	0	0	0	0	0	0	0	0	0	0	0	0	0	0	0	0
Ent_WA14	0	0	0	0	0	0	0	0	0	0	1	0	0	0	0	0	0	0	2	0	0	0	0	0	0	0	0	0	0	0	0	0	0	0	1	0	0	0	0	0	0	0	0	0	0	0	0	0	0
Ent_WA4	0	0	0	0	0	0	0	0	0	0	0	0	0	0	0	0	0	0	0	0	0	0	0	0	0	0	0	0	0	0	0	0	0	0	0	0	0	0	0	0	0	0	0	0	0	0	0	0	0
Ent_WA5	0	0	0	0	0	0	0	0	0	0	0	0	0	0	0	0	0	0	0	0	0	0	0	0	0	0	0	0	0	0	0	0	0	0	0	0	0	0	0	0	0	0	0	0	0	0	0	0	0
Ent_WV8	2	7	4	8	8	4	0	1	0	0	5	3	1	3	1	0	0	0	1	1	5	1	0	0	0	0	2	0	3	4	7	2	8	3	3	2	0	0	0	0	0	0	0	14	22	2	2	0	1
Ent_YYZ2008	0	2	0	0	0	0	0	0	0	0	0	0	0	0	0	0	0	0	3	2	0	0	0	0	3	0	2	3	1	0	2	0	0	1	11	7	0	0	0	0	0	0	0	0	0	0	0	0	0
Ent_cdtI	2	1	0	2	3	0	0	2	0	0	1	0	0	0	0	0	0	0	5	1	0	0	0	0	0	0	5	0	5	0	1	2	2	5	81	22	0	0	0	0	0	0	0	0	0	0	0	0	0
Ent_epsilon15	3	11	1	0	1	2	0	1	0	0	4	1	2	0	1	0	2	5	30	24	1	0	0	0	0	1	2	0	0	1	11	3	0	14	7	0	0	0	0	0	0	0	0	0	0	0	4	0	0
Ent_f1	0	0	0	0	0	0	0	0	0	0	0	0	0	0	0	0	0	0	0	0	0	0	0	0	0	0	0	0	1	0	0	0	0	4	4	1	0	0	0	0	0	0	0	0	0	0	0	0	0
Ent_fd	0	0	0	0	0	0	0	0	0	0	0	0	4	0	0	1	0	0	0	0	0	0	0	0	0	0	0	0	0	0	0	0	0	14	11	9	0	0	0	0	0	0	0	0	0	0	0	0	0
Ent_phage	0	12	4	26	20	39	2	2	0	0	3	9	3	1	2	1	3	0	18	23	1	0	0	0	4	1	28	3	26	4	12	0	26	7	5	7	0	0	0	0	0	1	0	1	4	1	1	0	0
Ent_phiEco32	8	5	2	5	0	1	0	0	0	1	3	1	2	0	1	2	2	0	1	3	1	0	0	0	0	0	3	0	5	2	5	8	5	0	5	1	0	0	0	0	0	0	0	0	0	0	0	0	0
Ent_phiEcoMGJ1	0	4	4	7	2	0	0	0	0	0	2	0	1	0	0	1	0	0	0	0	1	0	0	0	0	0	3	0	1	4	4	0	7	2	2	6	0	0	0	0	0	0	0	0	0	0	0	0	0
Ent_phiEf11	0	3	4	6	4	6	2	1	0	0	4	1	1	3	0	0	1	1	1	7	1	0	0	0	0	0	9	0	5	4	3	0	6	4	1	0	0	0	0	0	0	2	0	0	0	1	1	0	1
Ent_phiFL1A	0	1	0	3	2	1	0	0	0	0	3	1	0	0	0	1	0	1	1	1	0	0	0	0	0	0	1	0	2	0	1	0	3	1	0	1	0	0	0	0	0	1	0	0	0	0	0	0	0
Ent_phiFL2A	0	0	5	7	4	16	0	0	0	0	3	1	0	1	2	0	0	0	2	1	1	1	0	0	0	0	5	0	11	5	0	0	7	1	0	0	0	0	0	0	0	0	0	0	0	11	4	0	0
Ent_phiFL3A	1	4	0	1	1	0	0	3	0	0	0	1	2	0	0	0	0	0	2	0	2	0	0	0	0	0	3	0	6	0	4	1	1	0	0	0	0	0	0	0	0	0	0	0	0	0	0	0	0
Ent_phiFL4A	3	4	0	6	4	0	1	2	0	0	1	0	1	0	1	0	0	0	1	2	3	0	0	0	0	0	3	0	1	0	4	3	6	1	2	1	0	0	0	0	0	0	0	0	0	1	0	0	0
Ent_phiV10	9	4	3	0	2	1	0	0	0	0	2	1	0	2	3	0	0	3	5	8	0	0	0	0	0	0	2	0	0	3	4	9	0	17	12	5	0	0	0	0	0	0	0	0	0	0	11	0	1
Erw_Era103	3	5	0	0	0	0	0	1	0	0	1	0	0	1	0	0	0	0	1	0	1	0	0	0	1	0	1	0	0	0	5	3	0	0	1	0	0	0	0	0	0	0	0	0	0	0	0	0	0
Erw_phiEa214	11	7	4	6	4	9	1	1	0	2	9	2	0	0	0	0	1	0	3	2	1	1	0	0	2	0	6	0	8	4	7	11	6	0	0	3	0	0	0	0	0	0	0	0	0	0	1	0	0
Esc_D108	5	3	1	0	1	13	0	8	0	1	3	3	0	1	0	1	0	0	1	3	1	0	0	0	0	0	1	0	2	1	3	5	0	2	3	3	0	0	0	0	0	0	0	0	0	1	0	0	0
Esc_rv5	4	9	3	10	4	12	2	1	2	1	1	7	2	0	0	1	0	0	3	3	3	27	0	0	0	1	11	0	5	3	9	4	10	1	4	6	0	0	0	0	0	1	0	0	0	1	0	0	0
Geo_GBSV1	2	0	0	0	1	0	0	0	0	0	0	0	0	0	0	0	0	0	0	0	0	0	1	0	0	0	2	0	1	0	0	2	0	1	0	0	0	0	0	0	0	0	0	0	0	0	0	0	0
Geo_virus_E2	1	8	0	2	4	0	0	0	0	0	2	1	2	0	0	0	0	0	1	3	2	0	1	0	0	0	2	0	0	0	8	1	2	0	6	2	0	0	0	0	0	0	0	0	0	0	1	0	0
HF1	0	6	0	0	0	0	0	0	0	0	2	2	0	0	0	0	0	0	0	0	0	0	0	0	0	0	1	0	0	0	6	0	0	0	0	2	0	0	0	0	0	0	0	0	0	0	0	0	0
HF2	19	7	1	9	2	440	0	12	1	1	4	2	1	0	1	3	0	0	1	3	4	2	0	1	0	0	2	0	0	1	7	19	9	1	0	4	0	0	0	0	0	1	0	0	0	1	0	0	0
Hae_HP1	3	3	5	7	7	0	0	4	0	0	5	2	2	1	0	0	0	2	1	3	0	0	1	0	0	0	5	0	3	5	3	3	7	40	17	13	0	0	0	0	0	0	0	0	0	0	0	0	1
Hae_HP2	0	0	0	1	2	0	0	0	0	0	2	1	1	0	2	0	0	0	0	0	0	0	0	0	0	0	1	0	2	0	0	0	1	8	0	6	0	0	0	0	0	0	0	0	0	0	0	0	0
Hal_phiHAP1	8	4	3	0	3	1	0	0	0	0	1	0	0	2	1	0	0	0	6	13	0	0	0	0	0	0	0	0	1	3	4	8	0	1	4	1	0	0	0	0	0	0	0	0	0	0	0	0	0
His_virus	0	2	2	0	0	0	0	0	0	0	1	1	0	0	0	0	0	0	1	0	0	0	0	0	0	0	1	0	1	2	2	0	0	0	3	1	0	0	0	0	0	0	0	0	0	0	0	0	0
Iod_phiPLPE	0	2	1	6	6	10	0	0	0	1	2	0	0	0	0	0	0	0	67	90	6	0	0	0	0	0	8	0	10	1	2	0	6	0	0	1	0	0	0	0	0	0	0	0	0	0	0	0	0
Kle_K11	2	4	0	2	1	0	0	0	0	0	0	1	0	0	0	0	0	0	0	0	0	0	0	0	0	0	0	0	0	0	4	2	2	5	1	5	0	0	0	0	0	0	0	0	0	0	0	0	0
Kle_KP32	0	0	0	0	1	0	0	0	0	0	1	0	0	1	0	0	1	0	0	0	0	0	0	0	0	0	0	0	4	0	0	0	0	0	13	4	0	0	0	0	0	0	0	0	0	0	0	0	0
Kle_KP34	2	3	1	8	0	1	0	1	0	0	3	0	1	0	0	0	2	0	0	1	0	0	0	0	0	0	0	0	0	1	3	2	8	0	1	1	0	0	0	0	0	0	0	0	0	0	0	0	0
Klu_Kvp1	1	2	0	2	0	0	0	0	0	0	1	2	1	0	0	0	0	0	1	0	0	0	0	0	0	0	0	0	1	0	2	1	2	6	7	8	0	0	0	0	0	0	0	0	0	0	0	0	0
Lac_1706	0	7	2	15	4	0	0	0	0	2	1	2	0	0	1	0	4	0	2	2	1	1	0	0	0	0	6	0	11	2	7	0	15	0	0	0	0	0	0	0	0	0	0	0	0	1	1	0	0
Lac_712	0	3	0	4	1	0	0	0	0	3	0	0	0	0	0	0	0	0	0	0	0	0	0	0	0	0	8	0	3	0	3	0	4	0	1	0	0	0	0	0	0	0	0	0	0	12	1	0	2
Lac_BK5T	0	5	2	9	0	0	0	0	0	0	4	1	2	1	0	0	1	0	0	0	0	0	2	0	0	0	2	0	11	2	5	0	9	0	2	1	0	0	0	0	0	0	0	0	0	0	0	0	0
Lac_CB13	0	4	0	0	0	0	0	0	0	1	1	2	0	0	0	0	0	0	1	0	5	0	0	0	0	0	0	0	5	0	4	0	0	0	2	0	0	0	0	0	0	0	0	0	0	14	1	0	2
Lac_CB19	0	0	0	0	0	0	0	0	0	0	0	0	0	0	0	0	0	0	0	0	0	0	0	0	0	0	0	0	0	0	0	0	0	0	0	0	0	0	0	0	0	0	0	0	0	2	0	0	0
Lac_CB20	0	0	0	1	0	0	0	0	0	0	1	1	0	1	0	0	0	0	0	0	0	0	0	0	1	0	4	0	2	0	0	0	1	0	3	1	0	0	0	0	0	0	0	0	0	23	2	0	0
Lac_KC5a	0	2	1	6	2	0	7	1	0	1	1	2	0	0	0	0	0	0	1	1	2	1	0	1	0	0	7	0	0	1	2	0	6	2	0	3	0	0	0	0	0	1	0	0	1	0	0	0	0
Lac_KSY1	0	8	2	9	4	0	0	2	0	0	3	3	3	0	0	4	0	0	8	5	6	0	0	0	1	0	13	1	8	2	8	0	9	0	1	1	0	0	0	0	0	0	0	0	0	0	0	0	1
Lac_LLH	4	2	1	1	1	0	0	0	0	0	1	0	1	0	0	0	0	0	0	3	0	0	0	0	2	0	1	1	1	1	2	4	1	1	0	0	0	0	0	0	0	0	0	0	0	0	0	0	0
Lac_Lb3381	1	6	1	14	5	1	5	0	0	2	11	9	1	3	0	3	0	0	4	5	7	0	0	0	1	0	7	1	19	1	6	1	14	0	2	2	0	0	0	0	0	0	0	0	0	0	0	0	0
Lac_LcNu	0	2	2	5	2	0	0	0	0	0	3	0	0	0	0	1	0	1	10	8	2	0	0	0	0	0	0	0	1	2	2	0	5	0	3	9	0	0	0	0	0	0	0	0	0	0	0	0	0
Lac_Lj928	1	3	0	8	2	43	0	0	0	0	2	1	1	0	2	0	0	1	1	3	3	3	0	0	1	2	8	0	4	0	3	1	8	0	0	0	0	0	0	0	0	0	0	0	0	2	0	0	0
Lac_Lj965	0	6	0	7	3	8	1	0	0	0	7	3	0	0	0	2	0	0	1	4	0	0	0	0	0	1	8	0	6	0	6	0	7	0	5	3	0	0	0	0	0	0	0	0	0	16	0	0	3
Lac_Lrm1	1	2	0	0	0	0	0	3	0	1	0	1	0	0	2	0	1	0	1	2	3	0	0	0	0	0	0	0	2	0	2	1	0	0	1	2	0	0	0	0	0	0	0	0	0	1	0	0	1
Lac_Lv1	0	10	2	5	2	2	0	1	0	0	2	0	0	0	0	0	0	0	1	0	1	0	0	0	2	0	8	0	5	2	10	0	5	1	2	0	0	0	0	0	0	0	0	0	0	0	0	0	2
Lac_P008	0	2	0	2	2	1	0	0	0	0	2	2	0	0	0	0	1	0	2	0	0	0	1	0	0	0	1	0	4	0	2	0	2	0	1	0	0	0	0	0	0	0	0	0	0	11	0	0	0
Lac_P087	10	6	4	11	5	12	0	1	0	1	5	6	4	1	2	0	1	0	2	0	6	1	0	0	0	0	8	0	13	4	6	10	11	1	10	2	0	0	0	0	0	1	0	0	1	0	0	0	1
Lac_P335	0	3	1	3	2	1	1	1	0	2	2	2	1	0	0	1	1	0	2	8	6	0	0	0	2	1	23	1	22	1	3	0	3	1	1	1	0	0	0	0	0	0	0	0	1	0	0	0	0
Lac_Q54	0	1	0	1	0	2	3	0	0	1	2	1	0	0	0	0	0	0	0	1	1	0	0	0	0	0	3	0	6	0	1	0	1	0	4	0	0	0	0	0	0	0	0	0	0	1	0	0	0
Lac_SL4	0	1	0	4	0	3	1	0	0	0	1	1	0	0	0	0	0	0	0	0	0	0	0	0	0	0	0	0	1	0	1	0	4	0	0	0	0	0	0	0	0	0	0	0	0	19	1	0	0
Lac_asccphi28	0	1	1	3	0	4	0	0	0	0	1	0	0	0	0	0	0	0	0	1	1	1	0	0	0	0	4	0	6	1	1	0	3	0	0	2	0	0	0	0	0	0	0	0	0	0	0	0	0
Lac_bIBB29	0	4	0	2	1	0	0	1	0	0	2	3	0	1	0	0	0	0	2	0	1	0	0	0	1	0	2	1	1	0	4	0	2	0	0	0	0	0	0	0	0	0	0	0	0	17	1	0	1
Lac_bIL67	0	12	0	3	1	0	0	0	0	0	1	0	0	0	0	0	0	0	1	0	5	0	0	0	0	0	3	0	4	0	12	0	3	0	0	0	0	0	0	0	0	2	0	0	0	0	0	0	0
Lac_c2	0	6	0	5	1	0	1	0	0	0	1	0	0	0	1	0	0	0	1	0	2	0	0	0	1	0	2	1	5	0	6	0	5	1	0	0	0	0	0	0	0	0	0	0	0	1	0	0	0
Lac_casei_A2	7	1	2	2	0	0	70	0	0	0	0	0	0	0	0	0	0	2	1	11	1	1	0	0	0	0	3	0	2	2	1	7	2	3	1	0	0	0	0	0	0	0	0	0	0	0	1	0	0
Lac_jj50	0	2	0	4	5	0	0	0	0	0	0	1	0	0	1	0	0	0	1	1	1	0	0	0	0	0	6	0	1	0	2	0	4	0	1	0	0	0	0	0	0	0	0	0	0	21	0	0	1
Lac_johnsonii_Lj771	1	5	3	7	3	2	0	0	0	0	3	3	0	0	1	0	0	1	4	0	0	0	0	0	1	0	3	1	4	3	5	1	7	0	0	0	0	0	0	0	0	0	0	0	0	0	0	0	4
Lac_lactis_TP9011	0	0	1	2	2	0	0	0	0	0	1	0	0	0	0	0	0	2	2	0	0	3	0	0	0	1	1	0	4	1	0	0	2	2	0	0	0	0	0	0	0	0	0	0	0	1	0	0	0
Lac_phi_adh	0	10	1	6	4	0	0	0	0	0	3	1	0	1	0	0	0	0	0	0	1	0	0	0	0	1	12	0	3	1	10	0	6	0	0	1	0	0	0	0	0	0	0	0	0	0	0	0	0
Lac_phismq86	1	1	4	7	2	0	0	0	0	1	3	2	0	0	0	0	0	1	1	2	1	0	0	0	1	0	5	1	5	4	1	1	7	0	0	4	0	0	0	0	0	0	0	0	0	0	0	0	2
Lac_plantarum_LP65	3	15	4	19	3	5	2	7	0	1	12	3	3	1	0	2	0	1	5	4	0	16	0	0	4	0	14	2	14	4	15	3	19	3	2	4	0	0	0	3	0	12	1	1	1	1	0	0	0
Lac_plantarum_phiJL1	1	2	2	2	1	1	0	0	0	0	0	0	1	0	1	0	0	0	0	0	3	0	0	0	0	0	2	0	4	2	2	1	2	0	1	0	0	0	0	0	0	0	0	0	0	0	0	0	0
Lac_ul36k1	1	5	1	4	1	3	1	0	0	0	0	1	1	0	0	0	0	0	1	0	6	0	0	0	0	0	4	0	2	1	5	1	4	0	0	0	0	0	0	0	0	0	0	0	0	0	0	0	0
Lac_ul36k1t1	0	0	0	0	1	0	0	0	0	0	0	0	0	0	0	0	0	0	0	0	0	0	0	0	0	0	0	0	1	0	0	0	0	0	0	0	0	0	0	0	0	0	0	0	0	0	0	0	0
Lac_ul36t1k1	0	0	2	3	0	0	0	0	0	0	1	0	0	0	0	0	0	0	1	0	0	1	0	0	0	0	4	0	1	2	0	0	3	0	0	0	0	0	0	0	0	0	0	0	0	0	0	0	0
Lis_2389	0	3	0	7	3	0	0	0	0	0	0	1	3	0	0	1	0	1	1	0	2	0	0	0	2	0	6	1	5	0	3	0	7	0	0	1	0	0	0	0	0	0	0	0	0	2	0	0	0
Lis_A006	0	0	1	11	6	5	1	1	0	0	0	0	1	0	0	0	0	2	6	1	1	0	0	0	0	0	2	0	1	1	0	0	11	2	1	0	0	0	0	0	0	0	0	0	0	0	0	0	0
Lis_A500	0	1	2	10	1	0	0	5	0	1	2	4	1	1	0	0	0	0	8	2	6	0	0	1	3	0	3	0	8	2	1	0	10	0	0	0	0	0	0	0	0	1	0	0	0	0	0	0	0
Lis_A511	13	19	10	15	12	5	1	6	0	0	6	5	2	1	1	1	2	0	3	3	12	10	1	0	3	1	19	2	23	10	19	13	15	17	0	25	0	0	0	0	0	0	0	0	1	0	0	0	0
Lis_B025	0	6	3	8	7	0	0	0	0	0	1	5	0	1	0	1	0	0	2	1	0	0	0	0	0	1	13	0	8	3	6	0	8	3	1	0	0	0	0	0	0	0	0	0	0	0	0	0	0
Lis_B054	1	2	1	12	2	0	2	1	0	0	2	3	0	0	0	0	0	0	0	2	8	0	0	0	4	0	11	3	7	1	2	1	12	1	6	1	0	0	0	0	0	0	0	0	0	0	0	0	0
Lis_P100	0	3	1	5	3	0	0	1	0	0	4	1	0	0	1	0	1	0	2	1	0	0	0	0	4	0	19	2	21	1	3	0	5	0	2	0	6	0	0	0	0	0	0	27	73	5	29	0	5
Lis_P35	0	2	2	3	2	0	2	0	0	0	0	0	0	0	0	0	0	0	1	0	0	0	0	0	0	0	4	0	2	2	2	0	3	0	0	0	0	0	0	0	0	1	0	0	0	0	0	0	0
Lis_P40	0	5	1	1	0	2	0	0	0	0	0	1	0	0	1	0	0	0	0	0	0	0	0	0	0	1	1	0	5	1	5	0	1	2	1	0	0	0	0	0	0	0	0	0	0	0	0	0	0
Lis_pelagia_phiHSIC	1	10	0	3	1	0	0	0	0	0	2	3	1	1	0	0	0	0	12	7	1	353	0	0	0	0	2	0	2	0	10	1	3	1	3	2	0	0	0	0	0	0	0	0	0	0	0	0	0
Man_phiMHaA1	0	1	1	0	0	0	0	0	0	0	0	2	0	0	0	0	0	0	0	0	2	0	0	0	0	0	1	0	2	1	1	0	0	4	0	0	0	0	0	0	0	0	0	0	0	0	0	0	0
Met_psiM2	0	1	1	0	3	0	1	0	0	0	0	0	0	0	0	0	0	0	0	0	0	0	0	0	0	1	0	0	0	1	1	0	0	0	0	0	0	0	0	0	0	0	0	0	0	0	0	0	0
Met_wolfeii_psiM100	0	0	1	4	0	0	0	0	0	0	1	1	0	0	0	0	0	0	0	0	0	0	0	0	1	0	4	1	5	1	0	0	4	0	8	2	0	0	0	0	0	0	0	0	0	0	0	0	0
Mic_MaLMM01	1	10	6	5	7	0	2	0	4	0	4	2	2	0	0	0	0	0	2	1	3	0	0	0	3	0	7	0	5	6	10	1	5	1	0	21	0	0	0	0	0	1	0	0	5	0	0	0	0
Mic_Min1	52	6	2	1	8	47	0	5	0	0	4	0	0	0	0	0	0	0	5	10	2	0	0	0	0	0	0	0	1	2	6	52	1	1	13	16	0	0	0	0	0	0	0	0	0	0	0	0	0
Mor_MmP1	0	0	0	1	1	0	1	0	0	1	1	3	0	0	0	0	0	0	2	1	0	0	0	0	0	0	1	0	2	0	0	0	1	4	0	0	0	0	0	0	0	0	0	0	0	0	0	0	0
Myc_244	25	2	2	0	1	0	0	6	0	0	6	0	0	3	2	4	6	0	10	14	1	1	0	0	0	0	3	0	1	2	2	25	0	1	29	7	0	0	0	0	0	0	0	0	0	0	0	0	0
Myc_Adjutor	11	2	0	0	1	0	0	3	1	0	5	2	0	0	1	1	1	0	2	3	1	0	0	0	2	0	1	1	2	0	2	11	0	4	3	7	0	0	0	0	0	0	0	0	0	0	0	0	0
Myc_Angel	55	10	12	3	3	2	1	3	0	5	5	0	0	0	0	4	1	0	3	2	1	0	0	0	0	0	0	0	0	12	10	55	3	3	15	7	0	0	0	0	0	0	0	0	0	0	0	0	1
Myc_Barnyard	26	2	4	0	0	0	0	2	0	0	2	0	2	0	0	0	0	0	0	6	1	0	0	0	0	0	1	0	1	4	2	26	0	4	3	3	0	0	0	0	0	0	0	0	0	0	0	0	0
Myc_Bethlehem	2	0	0	0	0	0	0	0	0	0	0	0	0	0	1	0	0	0	0	0	0	0	0	0	0	0	0	0	0	0	0	2	0	0	0	2	0	0	0	0	0	0	0	0	0	0	0	0	0
Myc_Boomer	17	1	6	2	9	0	1	1	0	0	5	0	1	3	2	1	1	1	19	21	2	0	0	0	0	0	0	0	0	6	1	17	2	0	9	1	0	0	0	0	0	0	0	0	0	0	0	0	0
Myc_Brujita	110	8	10	0	0	0	0	6	0	1	6	2	1	0	0	0	0	1	34	36	3	1	0	0	0	0	0	0	1	10	8	110	0	4	9	10	0	0	0	0	0	0	0	0	0	0	0	0	1
Myc_Butterscotch	0	0	0	0	0	0	0	0	0	0	1	0	0	0	0	0	0	0	0	0	0	0	0	0	0	0	0	0	0	0	0	0	0	0	0	0	0	0	0	0	0	0	0	0	0	0	0	0	0
Myc_Bxb1	21	5	3	1	3	0	0	1	0	0	10	2	0	0	0	2	0	0	2	1	0	0	0	0	0	0	0	0	0	3	5	21	1	3	3	5	0	0	0	0	0	0	0	0	0	0	0	0	0
Myc_Bxz1	7	2	1	0	2	0	0	0	0	0	0	0	0	0	0	0	1	0	1	1	0	0	0	0	0	0	0	0	0	1	2	7	0	0	0	4	0	0	0	0	0	1	0	0	0	0	0	0	0
Myc_Bxz2	41	5	3	1	5	0	1	2	0	0	3	1	1	1	1	1	1	0	11	12	9	0	0	0	0	0	1	0	1	3	5	41	1	3	12	21	0	0	0	0	0	0	0	0	0	1	0	0	0
Myc_CJW1	4	0	2	0	0	0	0	3	0	0	3	0	0	0	0	0	0	0	2	2	0	1	0	0	0	0	0	0	0	2	0	4	0	0	1	2	0	0	0	0	0	0	0	0	0	0	0	0	0
Myc_Cali	23	0	4	1	1	0	0	3	0	1	1	1	0	0	0	0	1	0	0	1	1	0	0	0	0	0	0	0	0	4	0	23	1	0	8	0	0	0	0	0	0	0	0	0	0	0	0	0	0
Myc_Catera	0	0	0	0	0	0	0	0	0	0	0	0	0	0	0	0	0	0	1	0	0	0	0	0	0	0	1	0	0	0	0	0	0	0	0	0	0	0	0	0	0	0	0	0	0	0	0	0	1
Myc_Chah	64	11	13	0	1	0	0	3	0	0	6	2	1	1	0	1	2	3	4	7	2	2	1	13	0	0	1	0	0	13	11	64	0	2	46	3	0	0	0	0	0	0	0	0	0	0	0	0	0
Myc_Che12	19	1	2	10	2	0	0	3	0	1	0	0	0	2	0	2	0	0	7	11	0	8	3	0	0	0	0	0	7	2	1	19	10	1	8	24	0	0	0	0	0	0	0	0	0	0	0	0	0
Myc_Che8	37	0	3	3	0	0	0	1	0	0	0	0	0	0	1	0	0	0	0	0	0	0	0	0	0	0	0	0	0	3	0	37	3	0	2	2	0	0	0	0	0	0	0	0	0	0	0	0	0
Myc_Che9c	25	7	11	0	8	0	0	1	1	0	7	1	1	0	0	2	2	0	11	27	2	2	0	0	0	0	0	0	3	11	7	25	0	5	10	1	0	0	0	0	0	0	0	0	0	0	0	0	0
Myc_Che9d	15	11	3	0	0	0	0	2	0	0	3	0	0	0	0	0	2	0	5	7	1	0	0	0	0	0	1	0	2	3	11	15	0	1	6	1	0	0	0	0	0	0	0	0	0	0	0	0	0
Myc_Cooper	86	12	13	4	33	4	1	10	0	0	4	2	1	0	0	2	1	0	12	15	1	1	0	0	1	0	1	0	1	13	12	86	4	1	60	17	0	0	0	0	0	0	0	0	0	0	0	0	1
Myc_Corndog	76	7	6	0	4	0	0	5	0	0	4	0	1	1	1	2	1	0	9	10	0	1	0	0	0	0	1	0	3	6	7	76	0	3	27	8	0	0	0	0	0	0	0	0	0	0	0	0	1
Myc_D29	13	6	0	0	4	0	0	4	0	1	2	0	0	3	0	1	0	0	4	4	1	0	0	0	0	0	0	0	0	0	6	13	0	0	0	22	0	0	0	0	0	0	0	0	0	0	0	0	0
Myc_ET08	10	2	3	1	5	1	0	0	0	1	1	0	0	2	2	3	4	2	3	8	1	0	1	0	0	0	0	0	1	3	2	10	1	0	7	3	0	0	0	0	0	0	0	0	0	0	0	0	0
Myc_Fruitloop	10	0	4	0	6	0	0	5	0	0	2	1	1	0	0	0	0	0	6	5	0	0	0	0	0	0	0	0	2	4	0	10	0	1	1	0	0	0	0	0	0	0	0	0	0	0	0	0	0
Myc_Giles	68	10	8	3	6	0	0	5	0	0	17	3	1	1	0	1	4	2	8	2	2	0	0	0	0	1	0	0	3	8	10	68	3	1	5	422	0	0	0	0	0	0	0	2	1	0	2	0	2
Myc_Gumball	5	1	2	0	3	0	0	5	0	0	0	0	0	0	0	0	0	0	2	1	0	0	0	0	0	0	0	0	1	2	1	5	0	0	4	3	0	0	0	0	0	0	0	0	0	0	0	0	0
Myc_Halo	7	0	2	0	0	0	0	1	0	0	0	0	0	0	0	0	0	0	0	0	0	0	0	0	0	0	0	0	0	2	0	7	0	0	0	0	0	0	0	0	0	0	0	0	0	0	0	0	0
Myc_Jasper	15	2	3	0	1	0	0	2	0	0	1	0	0	0	0	1	0	0	7	9	1	0	0	0	0	0	0	0	1	3	2	15	0	0	0	0	0	0	0	0	0	0	0	0	0	0	0	0	0
Myc_KBG	5	2	2	0	1	0	0	0	0	0	1	0	0	0	0	0	0	0	1	0	0	0	0	0	0	0	0	0	0	2	2	5	0	0	1	0	0	0	0	0	0	0	0	0	0	0	0	0	0
Myc_Konstantine	25	7	5	0	1	0	5	2	0	0	1	0	0	0	0	1	0	0	1	2	0	0	0	0	0	0	0	0	0	5	7	25	0	0	8	1	0	0	0	0	0	0	0	0	0	0	0	0	0
Myc_Kostya	5	1	6	3	0	0	0	1	0	0	0	1	0	0	0	0	0	0	0	0	1	1	0	0	0	0	0	0	0	6	1	5	3	0	2	1	0	0	0	0	0	0	0	0	0	1	0	0	0
Myc_L5	25	5	3	1	25	0	0	0	0	0	2	0	0	0	0	0	1	1	5	2	1	0	0	0	0	0	0	0	2	3	5	25	1	5	10	4	0	0	0	0	0	0	0	0	1	1	0	0	1
Myc_Llij	4	0	1	1	1	0	0	2	0	0	0	0	0	0	0	0	0	0	2	8	0	0	0	0	0	0	0	0	0	1	0	4	1	4	3	3	0	0	0	0	0	0	0	0	0	0	0	0	0
Myc_Lockley	18	1	1	0	1	0	0	3	0	0	3	0	0	0	0	0	0	0	28	21	0	0	0	0	0	0	0	0	0	1	1	18	0	3	2	0	0	0	0	0	0	0	0	0	0	0	0	0	0
Myc_Myrna	151	26	28	6	8	12	0	14	0	0	22	0	2	4	3	9	3	7	29	26	4	8	0	3	0	1	7	0	2	28	26	151	6	6	46	271	0	0	0	0	0	0	0	0	0	28	5	0	3
Myc_Nigel	39	8	7	1	5	0	0	11	0	0	2	3	2	1	0	0	1	1	11	16	1	0	0	0	0	0	0	0	0	7	8	39	1	1	30	96	0	0	0	0	0	0	0	0	0	0	0	0	0
Myc_Omega	34	7	5	3	2	0	0	13	0	0	3	1	0	0	1	4	1	3	9	6	1	4	1	0	0	0	1	0	2	5	7	34	3	0	9	4	0	0	0	0	0	0	0	0	0	0	0	0	0
Myc_PG1	1	0	0	0	1	0	0	0	0	0	1	0	0	0	0	0	0	0	1	0	0	0	0	0	0	0	0	0	0	0	0	1	0	0	0	0	0	0	0	0	0	0	0	0	0	0	0	0	0
Myc_PLot	1	0	0	0	1	0	0	0	0	0	0	0	2	1	0	0	0	0	0	1	0	0	0	0	0	0	1	0	0	0	0	1	0	1	0	14	0	0	0	0	0	0	0	0	0	0	0	0	0
Myc_Pacc40	17	7	0	0	0	1	0	4	0	0	3	1	0	0	0	0	0	0	10	5	1	1	0	0	0	0	0	0	1	0	7	17	0	1	10	4	0	0	0	0	0	0	0	0	0	0	0	0	1
Myc_Peaches	38	3	5	1	0	1	0	2	1	0	5	1	0	3	0	0	0	0	4	5	0	0	0	0	0	0	0	0	0	5	3	38	1	2	10	5	0	0	0	0	0	0	0	0	0	0	0	0	0
Myc_Phaedrus	9	2	3	0	2	0	0	4	0	0	4	0	1	0	0	0	0	0	6	7	0	0	0	0	0	0	0	0	0	3	2	9	0	0	3	2	0	0	0	0	0	0	0	0	0	0	0	0	1
Myc_Phlyer	3	0	0	0	0	0	0	3	0	1	2	0	0	0	0	0	1	1	0	0	0	0	0	0	0	0	0	0	0	0	0	3	0	0	1	1	0	0	0	0	0	0	0	0	0	0	0	0	0
Myc_Pipefish	52	6	11	0	2	0	0	7	0	0	8	1	0	1	0	1	2	2	9	4	1	0	0	0	0	0	0	0	4	11	6	52	0	1	10	2	0	0	0	0	0	0	0	0	0	0	0	0	1
Myc_Porky	3	0	2	0	0	0	0	0	0	0	2	0	0	0	0	0	0	0	1	2	0	0	0	0	0	0	0	0	0	2	0	3	0	0	0	0	0	0	0	0	0	0	0	0	0	0	0	0	0
Myc_Predator	29	5	5	1	2	0	0	3	0	0	5	0	0	0	0	0	1	0	2	1	0	0	0	0	1	0	1	0	0	5	5	29	1	1	1	1	0	0	0	0	0	0	0	0	0	0	0	0	21
Myc_Pukovnik	22	1	5	0	5	1	0	7	0	0	2	0	1	1	0	1	1	0	27	21	0	0	0	1	0	0	1	0	1	5	1	22	0	0	6	5	0	0	0	0	0	0	0	0	0	0	0	0	1
Myc_Qyrzula	77	8	7	3	4	1	0	8	0	2	3	1	1	1	0	1	1	1	3	2	1	0	0	0	0	0	1	0	2	7	8	77	3	1	25	39	0	0	0	0	0	0	0	0	0	0	0	0	1
Myc_Ramsey	11	1	1	0	3	0	0	0	0	1	1	0	0	0	0	2	0	0	3	6	0	0	0	0	0	0	0	0	0	1	1	11	0	1	0	4	0	0	0	0	0	0	0	0	0	0	0	0	0
Myc_Rizal	6	1	1	0	3	0	0	0	0	0	0	1	1	0	0	0	1	0	0	0	0	1	0	0	0	0	0	0	0	1	1	6	0	0	0	0	0	0	0	0	0	0	0	0	0	0	0	0	0
Myc_Rosebush	6	5	1	0	0	0	0	0	0	2	0	0	0	0	0	0	0	0	2	1	0	0	0	0	0	0	1	0	0	1	5	6	0	0	0	7	0	0	0	0	0	0	0	0	0	0	0	0	0
Myc_ScottMcG	0	2	1	0	0	0	0	0	0	0	0	0	0	0	0	0	0	0	1	0	0	0	0	0	0	0	0	0	0	1	2	0	0	0	1	0	0	0	0	0	0	0	0	0	0	0	0	0	0
Myc_Solon	1	1	0	0	1	0	0	0	0	0	2	0	0	0	0	1	3	0	9	5	0	0	0	0	0	0	0	0	0	0	1	1	0	0	0	3	0	0	0	0	0	0	0	0	0	0	0	0	0
Myc_Spud	103	18	9	8	5	13	0	14	0	3	17	1	4	2	0	0	3	6	12	21	11	14	2	1	0	0	1	0	10	9	18	103	8	39	56	95	0	0	0	0	0	0	0	13	3	1	0	0	5
Myc_TM4	78	10	17	3	4	0	0	9	0	1	1	1	0	2	1	0	1	1	21	26	4	0	0	0	0	0	1	0	1	17	10	78	3	9	16	8	0	0	0	0	0	0	0	0	0	0	1	0	1
Myc_Troll4	0	0	0	0	1	1	0	1	1	0	1	0	0	0	0	0	0	0	2	1	3	0	0	0	0	0	0	0	0	0	0	0	0	1	1	38	0	0	0	0	0	0	0	0	0	0	0	0	0
Myc_Tweety	11	0	0	0	0	0	0	0	0	0	1	1	0	0	0	0	0	0	6	5	0	0	0	0	0	0	0	0	1	0	0	11	0	0	0	0	0	0	0	0	0	0	0	0	0	0	0	0	0
Myc_U2	13	1	3	1	0	2	0	1	0	0	0	1	0	0	0	0	1	0	2	3	0	0	0	0	0	0	0	0	0	3	1	13	1	1	2	42	0	0	0	0	0	0	0	0	0	0	0	0	0
Myc_Wildcat	9	1	1	5	2	0	1	1	0	0	2	3	0	2	1	0	2	0	3	0	6	0	0	0	0	0	0	0	0	1	1	9	5	0	2	0	0	0	0	0	0	0	0	0	0	0	0	0	0
Myc_arthritidis_MAV1	0	0	3	4	4	2	0	2	0	0	3	0	0	0	0	0	0	0	0	1	0	0	0	0	4	0	5	1	7	3	0	0	4	0	49	1	6	0	0	2	0	5	0	0	0	0	0	0	0
Myc_virus_P1	0	4	4	5	1	0	0	0	0	1	4	0	0	1	0	0	1	0	0	0	2	0	0	0	0	0	10	0	9	4	4	0	5	0	0	0	0	0	0	0	0	0	0	0	0	0	0	0	0
Pas_F108	0	0	0	4	1	4	0	0	0	0	1	2	1	2	1	3	0	0	1	0	0	0	0	0	1	1	1	1	4	0	0	0	4	28	3	1	0	0	0	0	0	0	0	0	0	0	0	0	0
Pha_Gifsy1	4	1	0	1	1	0	0	0	0	1	3	0	0	0	0	0	0	1	2	1	2	0	0	0	0	0	2	0	2	0	1	4	1	9	20	4	0	0	0	0	0	0	0	0	0	0	0	0	0
Pha_Gifsy2	9	2	1	2	0	0	0	0	0	0	0	2	0	0	0	1	0	0	10	9	0	0	0	0	1	1	6	1	2	1	2	9	2	73	15	5	0	0	0	0	0	0	0	0	0	3	0	0	0
Pha_phiMH2K	0	5	1	10	1	1	13	0	0	0	0	0	0	0	0	0	0	0	0	22	0	4	0	0	0	0	0	0	0	1	5	0	10	0	0	0	0	0	0	0	0	0	0	0	0	0	0	0	0
Pha_phiSMA9	1	2	0	0	0	0	3	0	0	0	0	0	0	0	0	0	0	0	0	0	0	0	0	0	0	0	0	0	1	0	2	1	0	0	0	0	0	0	0	0	0	0	0	0	0	0	0	0	0
Pha_phi_4795	2	1	0	1	1	1	0	0	0	0	2	0	0	0	0	0	0	1	1	1	0	0	0	0	0	0	2	0	3	0	1	2	1	4	11	0	0	0	0	0	0	0	0	0	0	0	0	0	0
Pho_PfWMP3	0	0	0	4	0	3	0	3	0	0	0	0	1	0	0	0	1	0	0	0	1	0	0	0	1	0	1	0	0	0	0	0	4	0	0	1	0	0	0	0	0	0	0	0	0	0	0	0	0
Pho_PfWMP4	3	1	0	0	0	0	0	0	0	0	2	0	0	0	0	0	0	0	0	0	6	0	0	0	0	0	3	0	2	0	1	3	0	0	5	4	0	0	0	0	0	0	0	0	0	0	0	0	0
Pro_PA6	4	2	0	0	4	0	1	0	0	1	1	0	0	0	0	0	0	0	2	1	0	0	0	0	0	0	1	0	0	0	2	4	0	0	135	43	0	0	0	0	0	0	0	0	0	0	0	0	0
Pro_PHM1	3	32	12	175	6	3	3	8	0	0	12	37	3	2	4	7	3	1	2	3	2	0	1	0	0	0	12	0	26	12	32	3	175	0	2	2	0	0	0	0	0	0	0	0	0	11	0	0	0
Pro_PHM2	8	36	18	224	11	0	3	2	0	1	27	45	3	1	1	4	1	2	1	0	2	1	0	0	5	3	20	2	22	18	36	8	224	0	4	3	0	0	0	0	0	0	0	0	0	0	1	0	0
Pro_PRSM4	4	45	17	209	9	1	5	3	0	0	20	35	12	4	2	1	7	0	11	13	6	0	0	1	6	0	16	4	13	17	45	4	209	18	57	3	0	0	0	0	0	0	0	0	0	2	0	0	2
Pro_PSSM2	0	0	0	1	0	0	0	0	0	0	0	0	0	0	0	0	0	0	0	0	0	0	0	0	0	0	0	0	0	0	0	0	1	0	0	0	0	0	0	0	0	0	0	0	0	0	0	0	0
Pro_PSSM4	10	41	23	405	16	2	22	3	0	0	26	37	3	4	2	3	3	5	4	6	4	4	0	0	3	0	36	2	26	23	41	10	405	4	7	2	0	0	0	0	0	0	0	0	0	0	0	0	2
Pro_PSSM7	9	63	24	336	30	5	5	4	0	0	23	41	9	7	3	3	5	2	17	17	8	2	0	0	1	1	17	1	24	24	63	9	336	10	11	5	0	0	0	0	0	2	0	0	0	0	0	0	2
Pro_Syn33	6	185	27	130	8	6	5	5	0	2	31	32	4	5	3	1	3	1	12	6	4	2	0	0	1	1	17	0	10	27	185	6	130	3	36	2	0	0	0	0	0	0	0	0	0	0	0	0	0
Pro_phiB5	0	0	0	0	2	0	0	1	0	0	0	0	0	0	0	0	0	0	0	0	0	0	0	0	0	0	0	0	0	0	0	0	0	0	6	0	0	0	0	0	0	0	0	0	0	0	0	0	0
Pse_119X	0	0	0	1	0	0	0	0	0	0	0	0	1	0	0	0	0	0	4	1	3	0	0	0	1	0	4	0	7	0	0	0	1	1	0	0	0	0	0	0	0	0	0	0	0	0	0	0	0
Pse_141	10	3	1	0	1	3	1	1	0	0	3	0	0	1	0	1	0	0	2	2	0	0	0	0	0	0	3	0	3	1	3	10	0	0	10	7	0	0	0	0	0	0	0	0	0	0	0	0	0
Pse_201phi21	1	4	10	7	7	3	2	6	1	0	10	4	4	0	0	2	0	0	2	3	5	0	0	0	1	1	7	0	8	10	4	1	7	7	15	12	0	0	0	0	0	3	0	3	11	2	5	0	1
Pse_73	7	3	2	1	2	0	2	1	0	0	4	0	0	0	0	3	2	2	18	16	0	0	0	0	0	0	0	0	0	2	3	7	1	0	6	6	0	0	0	0	0	0	0	0	0	0	0	0	0
Pse_D3	26	7	4	2	5	1	1	4	0	0	5	0	1	0	1	0	0	0	13	20	5	3	0	0	0	0	1	0	1	4	7	26	2	6	10	2	0	0	0	0	0	0	0	0	0	0	0	0	0
Pse_DMS3	8	1	3	0	0	0	0	0	0	0	0	0	2	0	0	0	0	0	0	7	0	0	0	0	0	0	0	0	1	3	1	8	0	0	7	3	0	0	0	0	0	0	0	0	0	0	0	0	0
Pse_EL	5	10	5	4	6	0	1	3	0	0	8	0	2	0	0	0	5	0	3	2	2	0	0	0	0	0	4	0	7	5	10	5	4	4	0	87	0	0	0	0	0	0	0	0	0	2	5	0	2
Pse_F10	5	2	3	0	3	0	0	5	0	0	2	0	0	0	0	1	0	0	4	9	0	0	0	0	0	0	0	0	2	3	2	5	0	0	18	5	0	0	0	0	0	0	0	0	0	5	3	0	0
Pse_F116	24	2	3	1	1	20	0	0	0	0	6	0	0	0	0	1	0	0	11	18	0	11	3	0	0	0	0	0	2	3	2	24	1	3	13	31	0	0	0	0	0	0	0	0	0	0	1	0	2
Pse_F8	10	5	5	1	5	1	0	0	0	0	1	0	0	1	0	0	0	0	6	0	0	1	2	0	0	0	2	0	2	5	5	10	1	2	11	1	0	0	0	0	0	0	0	0	0	0	0	0	0
Pse_LBL3	2	3	2	0	0	0	0	2	0	0	0	0	0	1	1	0	0	0	0	1	0	0	0	0	0	0	0	0	1	2	3	2	0	0	4	1	0	0	0	0	0	0	0	0	0	2	0	0	0
Pse_LIT1	1	1	2	4	0	3	1	0	0	0	1	4	0	0	0	2	2	0	3	6	0	0	0	0	0	0	1	0	4	2	1	1	4	1	7	6	0	0	0	0	0	0	0	0	0	0	0	0	2
Pse_LKA1	8	2	0	1	2	0	0	1	0	0	2	0	0	0	0	0	0	0	0	2	1	0	0	0	0	0	2	0	0	0	2	8	1	1	4	8	0	0	0	0	0	0	0	0	0	0	0	0	0
Pse_LKD16	18	2	2	2	3	0	0	1	1	0	0	1	1	0	0	1	0	0	8	2	1	0	0	0	0	0	0	0	0	2	2	18	2	1	2	7	0	0	0	0	0	0	0	0	0	0	0	0	0
Pse_LMA2	0	0	0	0	1	0	0	0	0	0	0	0	0	0	0	0	0	0	0	1	0	0	0	0	0	0	0	0	0	0	0	0	0	1	1	1	0	0	0	0	0	0	0	0	0	0	0	0	0
Pse_LUZ19	7	1	0	0	0	0	0	0	0	0	1	0	0	0	0	0	0	0	0	1	0	0	0	0	0	0	0	0	0	0	1	7	0	0	0	1	0	0	0	0	0	0	0	0	0	0	0	0	0
Pse_LUZ24	8	1	0	0	1	8	0	0	0	1	7	1	0	1	0	0	2	1	4	5	1	0	0	0	0	0	1	0	0	0	1	8	0	3	0	0	0	0	0	0	0	0	0	0	0	0	0	0	0
Pse_LUZ7	1	2	1	0	0	2	0	1	0	0	2	0	0	0	0	0	0	0	1	2	1	0	0	0	0	0	1	0	0	1	2	1	0	1	1	1	0	0	0	0	0	0	0	0	0	0	0	0	0
Pse_M6	47	4	4	3	0	1	0	3	0	0	7	0	0	0	0	0	0	1	2	2	3	0	2	0	1	1	1	1	3	4	4	47	3	1	11	93	0	0	0	0	0	0	0	0	0	0	0	0	0
Pse_MP22	13	4	0	0	0	2	0	1	0	0	7	1	1	0	0	0	1	0	2	3	1	0	0	0	0	0	1	0	1	0	4	13	0	1	5	6	0	0	0	0	0	0	0	0	0	0	0	0	0
Pse_MP29	14	2	4	1	6	1	0	1	0	0	4	0	0	0	0	0	0	2	1	11	0	1	0	0	0	0	1	0	0	4	2	14	1	2	8	13	0	0	0	0	0	0	0	0	0	0	0	0	0
Pse_MP38	52	3	5	0	1	7	0	0	1	1	1	0	0	2	0	0	0	0	3	3	0	0	0	0	0	0	0	0	1	5	3	52	0	0	3	4	0	0	0	0	0	0	0	0	0	0	0	0	0
Pse_PA11	6	14	2	9	5	2	0	0	0	0	17	3	0	1	0	1	3	0	2	1	5	0	0	0	0	0	0	0	3	2	14	6	9	0	3	1	0	0	0	0	0	0	0	0	0	0	0	0	0
Pse_PAJU2	25	3	0	1	0	0	0	0	0	0	6	1	1	1	2	0	0	0	16	7	2	3	0	0	0	0	0	0	1	0	3	25	1	6	5	12	0	0	0	0	0	0	0	0	0	0	0	0	0
Pse_PB1	2	0	3	0	1	0	0	0	0	0	0	0	0	0	0	1	1	0	0	1	1	0	0	0	0	0	0	0	0	3	0	2	0	0	0	0	0	0	0	0	0	0	0	0	0	0	0	0	0
Pse_PRR1	0	0	0	0	0	0	0	0	0	0	0	0	0	0	0	0	0	0	0	0	0	0	0	0	0	0	0	0	0	0	0	0	0	0	0	0	0	0	0	0	0	0	0	0	0	0	0	0	0
Pse_PT2	0	0	2	1	5	0	0	0	0	0	1	0	0	0	0	0	0	1	0	1	0	0	0	0	0	0	0	0	1	2	0	0	1	0	0	0	0	0	0	0	0	0	0	0	0	0	0	0	0
Pse_PT5	0	0	0	0	1	0	0	0	0	0	0	0	0	0	0	0	0	0	0	0	1	0	0	0	0	0	0	0	2	0	0	0	0	0	1	0	0	0	0	0	0	0	0	0	0	0	0	0	0
Pse_Pf1	3	1	2	0	0	1	0	0	1	0	0	0	1	0	0	0	0	0	1	2	0	0	0	0	0	0	0	0	1	2	1	3	0	0	0	0	0	0	0	0	0	0	0	0	0	0	0	0	0
Pse_Pf3	0	0	1	0	0	0	0	0	0	0	1	0	0	0	0	0	0	0	0	0	0	0	0	0	0	0	1	0	0	1	0	0	0	0	0	0	0	0	0	0	0	0	0	0	0	0	0	0	0
Pse_SN	11	0	4	1	0	0	0	0	0	0	0	0	0	0	0	0	0	1	0	3	1	0	0	0	0	0	1	0	1	4	0	11	1	1	2	0	0	0	0	0	0	0	0	0	0	0	0	0	0
Pse_YuA	3	2	0	0	3	1	0	2	0	1	0	1	0	0	0	0	1	1	3	2	0	0	0	0	0	0	0	0	0	0	2	3	0	0	2	4	0	0	0	0	0	0	0	0	0	0	0	0	0
Pse_aeruginosa_PaP2	0	1	0	0	1	0	0	1	0	0	0	0	0	0	0	0	0	0	1	1	1	0	0	0	0	0	0	0	2	0	1	0	0	0	0	0	0	0	0	0	0	0	0	0	0	0	0	0	0
Pse_aeruginosa_PaP3	3	4	4	6	1	0	0	0	0	1	5	1	0	1	0	0	1	0	1	1	1	0	0	0	2	0	2	2	1	4	4	3	6	1	2	1	0	0	0	0	0	0	0	0	0	0	0	0	0
Pse_gh1	1	0	1	2	1	0	0	1	0	0	3	0	1	0	0	0	0	0	0	0	0	0	0	0	0	0	0	0	0	1	0	1	2	2	1	2	0	0	0	0	0	0	0	0	0	0	0	0	0
Pse_phi13	10	0	0	0	0	0	0	0	0	0	0	0	1	0	0	1	0	0	1	0	0	0	0	0	0	0	0	0	0	0	0	10	0	0	1	1	0	0	0	0	0	0	0	0	0	0	0	0	0
Pse_phi2	4	1	1	0	5	0	0	0	0	0	0	0	0	0	0	0	0	0	0	2	0	0	0	0	0	0	0	0	1	1	1	4	0	1	0	0	0	0	0	0	0	0	0	0	0	1	0	0	0
Pse_phi6	0	1	0	0	0	0	0	0	0	0	0	0	0	0	0	0	0	0	4	5	1	0	0	1	0	0	0	0	0	0	1	0	0	0	0	0	0	0	0	0	0	0	0	0	0	0	0	0	0
Pse_phiKZ	11	21	23	33	14	6	4	5	0	0	23	10	11	0	1	3	1	2	7	4	13	1	0	0	6	4	26	1	31	23	21	11	33	14	36	27	0	0	0	0	0	4	0	10	16	1	5	0	6
Pse_phikF77	10	1	2	2	3	0	0	5	0	0	4	0	0	0	0	0	0	0	2	0	0	1	0	0	0	0	0	0	0	2	1	10	2	0	9	4	0	0	0	0	0	0	0	0	0	0	0	0	0
Pyr_spherical_virus	6	1	2	0	0	0	4	0	0	0	3	0	1	0	0	0	0	0	0	0	0	0	25	12	3	0	4	2	2	2	1	6	0	0	0	0	0	0	0	0	0	0	0	0	0	0	0	0	0
Ral_RSB1	3	3	1	0	0	0	0	0	0	0	11	0	0	1	0	0	0	0	9	9	1	1	0	0	1	0	0	1	2	1	3	3	0	0	10	2	0	0	0	0	0	0	0	0	0	0	0	0	1
Ral_RSL1	49	4	8	4	8	4	0	6	0	1	12	2	1	1	0	2	0	2	7	6	2	2	0	0	0	0	3	0	3	8	4	49	4	44	62	180	0	0	0	0	0	1	0	1	0	2	1	0	0
Ral_RSM1	0	0	0	0	1	0	0	0	0	0	0	0	0	0	0	0	0	0	0	0	0	0	0	0	0	0	0	0	0	0	0	0	0	0	1	1	0	0	0	0	0	0	0	0	0	0	0	0	0
Ral_RSM3	2	0	0	0	0	0	0	0	0	0	0	0	0	0	0	0	0	0	0	0	0	0	0	0	0	0	0	0	0	0	0	2	0	0	3	0	0	0	0	0	0	0	0	0	0	0	0	0	0
Ral_RSS1	1	0	0	0	0	0	0	0	0	0	0	0	0	0	0	0	2	0	0	0	2	1	0	0	0	0	0	0	0	0	0	1	0	1	0	2	0	0	0	0	0	0	0	0	0	0	0	0	0
Ral_p12J	2	0	1	0	0	0	0	0	0	0	0	0	0	0	0	0	0	0	3	3	0	0	0	0	0	0	0	0	0	1	0	2	0	0	0	0	0	0	0	0	0	0	0	0	0	0	0	0	0
Ral_phiRSA1	23	1	9	1	0	0	0	0	0	0	1	1	0	0	0	0	1	0	17	16	1	0	0	0	0	0	0	0	0	9	1	23	1	8	11	7	0	0	0	0	0	0	0	0	0	0	0	0	1
Rhi_163	11	5	9	3	1	0	0	0	0	0	6	1	2	2	2	1	0	1	13	18	2	1	0	0	0	0	1	0	1	9	5	11	3	0	3	4	0	0	0	0	0	0	0	0	0	0	0	0	0
Ros_SIO1	1	67	103	5	1	1	0	2	0	0	48	18	7	5	4	1	0	3	2	1	7	0	0	0	0	0	7	0	1	103	67	1	5	0	0	1	0	0	0	0	0	0	0	0	0	0	0	0	0
SVT_plectrovirus	0	3	0	2	0	0	1	0	0	0	0	2	3	1	0	0	0	0	1	0	1	0	0	0	0	0	8	0	6	0	3	0	2	0	0	0	0	0	0	0	0	0	0	0	0	0	0	0	0
Sal_Fels1	3	0	0	1	2	0	0	0	0	0	2	0	0	0	0	0	0	0	4	8	0	0	0	0	1	0	2	0	1	0	0	3	1	7	10	1	0	0	0	0	0	0	0	0	1	0	0	0	0
Sal_P22pbi	0	2	0	2	1	0	0	0	0	0	1	1	0	0	0	1	0	0	3	0	0	0	0	0	0	1	1	0	3	0	2	0	2	3	10	1	0	0	0	0	0	0	0	0	0	1	0	0	0
Sal_SE1	0	1	0	0	0	0	0	0	0	0	1	0	0	0	0	0	0	0	0	0	0	0	0	0	0	0	1	0	0	0	1	0	0	0	0	0	0	0	0	0	0	0	0	0	0	0	0	0	0
Sal_SETP3	2	1	0	3	2	12	0	0	0	0	1	3	0	1	0	0	0	0	3	5	4	0	0	0	0	0	2	0	0	0	1	2	3	0	3	15	0	0	0	0	0	0	0	0	0	0	0	0	0
Sal_Vi_IIE1	9	0	1	4	0	23	0	2	0	0	0	0	0	0	0	0	0	0	1	2	7	11	0	0	0	0	1	0	1	1	0	9	4	2	2	0	0	0	0	0	0	0	0	0	0	0	0	0	0
Sal_c341	1	0	0	0	2	0	0	0	0	0	1	2	0	0	1	0	0	0	5	0	2	0	0	0	0	0	3	0	4	0	0	1	0	1	6	2	0	0	0	0	0	0	0	0	0	0	0	0	0
Sal_epsilon34	1	0	0	3	1	0	0	1	0	0	8	0	0	3	2	2	5	0	5	3	0	0	0	0	0	0	0	0	1	0	0	1	3	6	2	0	0	0	0	0	0	0	0	0	0	0	0	0	0
Sal_phiSGJL2	0	0	0	1	0	1	0	0	0	0	2	0	0	0	0	0	0	0	2	0	0	0	0	0	0	0	0	0	0	0	0	0	1	5	1	2	0	0	0	0	0	0	0	0	0	0	0	0	0
Sal_typhimurium_ES18	1	2	0	0	1	6	0	1	0	0	7	0	0	1	0	0	1	0	1	1	0	0	0	0	0	0	2	0	1	0	2	1	0	31	19	3	0	0	0	0	0	0	0	0	0	0	0	0	0
Sal_typhimurium_ST104	1	8	1	0	0	33	0	0	0	0	7	0	0	0	0	0	0	0	11	5	1	0	2	0	0	1	1	0	1	1	8	1	0	0	5	1	0	0	0	0	0	0	0	0	0	0	0	0	0
Sal_typhimurium_ST64B	10	8	5	2	0	1	0	0	0	0	3	0	1	0	0	0	1	0	1	2	1	11	0	0	0	0	0	0	0	5	8	10	2	8	7	3	0	0	0	0	0	0	0	0	0	5	0	0	0
Sal_typhimurium_ST64T	0	3	2	3	1	1	1	0	0	0	10	0	0	0	0	0	0	0	6	6	5	0	0	0	0	0	2	0	3	2	3	0	3	4	1	2	0	0	0	0	0	0	0	0	0	2	0	0	0
Shi_flexneri_V	3	0	0	0	0	0	0	0	0	0	6	1	0	0	0	0	1	0	0	0	1	1	0	0	0	1	0	0	1	0	0	3	0	4	3	1	0	0	0	0	0	0	0	0	0	0	0	0	0
Shi_phiSboMAG3	3	5	2	9	3	10	0	1	0	0	13	5	1	3	1	1	1	0	5	6	15	0	1	0	2	0	5	2	4	2	5	3	9	11	15	13	0	0	0	0	0	0	0	0	0	0	0	0	0
Sil_DSS3phi2	0	0	2	1	4	3	1	6	0	3	18	0	2	2	6	4	0	11	2	2	1	0	0	0	0	0	2	0	1	2	0	0	1	5	6	0	0	0	0	0	0	0	0	0	0	0	0	0	1
Sin_meliloti_PBC5	60	2	8	1	2	0	0	1	0	0	5	1	0	0	0	2	0	0	6	9	1	5	0	0	0	1	0	0	2	8	2	60	1	1	20	49	0	0	0	0	0	0	0	0	0	1	0	0	0
Sod_SO1	6	1	2	1	0	32	0	0	0	0	2	1	0	1	0	2	0	0	2	1	0	0	0	0	0	0	1	0	0	2	1	6	1	0	1	5	0	0	0	0	0	0	0	0	0	0	1	0	0
Sod_phiSG1	3	1	1	1	3	0	0	0	0	0	3	1	1	0	0	0	0	3	2	4	0	96	1	0	0	0	0	0	1	1	1	3	1	3	4	4	0	0	0	0	0	0	0	0	0	0	0	0	1
Spi_1C74	1	1	0	0	1	0	0	0	0	0	0	1	0	1	0	1	0	0	3	1	0	0	0	0	0	0	4	0	6	0	1	1	0	0	0	0	0	0	0	0	0	0	0	0	0	0	0	0	0
Spi_1R8A2B	0	4	3	7	7	0	1	1	0	0	1	0	1	0	1	0	0	0	1	0	1	0	0	1	2	0	10	2	4	3	4	0	7	0	2	0	0	0	0	0	0	0	0	0	0	2	0	0	0
Spi_4	1	6	2	1	2	7	8	0	0	0	0	0	0	0	0	0	0	0	0	7	0	0	0	0	0	0	2	0	0	2	6	1	1	0	0	0	0	0	0	0	0	0	0	0	0	0	0	0	0
Spi_kunkelii_virus_SkV1_CR23x	0	1	1	3	1	0	2	0	0	0	3	2	1	0	0	0	0	0	0	0	0	0	0	0	1	0	7	1	3	1	1	0	3	0	1	2	0	0	0	0	0	0	0	0	0	0	0	0	0
Spu_virophage	0	5	1	4	3	1	1	0	0	0	0	3	0	0	1	3	4	0	3	1	1	0	0	0	1	0	10	0	5	1	5	0	4	6	2	0	0	0	0	0	0	1	0	2	0	0	0	0	1
Sta_187	1	4	2	1	2	0	0	0	0	0	2	2	0	0	0	0	0	0	0	0	0	0	0	0	0	0	2	0	4	2	4	1	1	0	4	2	0	0	0	0	0	0	0	0	0	0	0	0	0
Sta_3A	0	0	0	1	0	0	4	0	0	0	1	0	0	0	0	0	0	0	0	0	0	0	0	0	1	0	2	1	0	0	0	0	1	0	0	0	0	0	0	0	0	0	0	0	0	0	0	0	0
Sta_44AHJD	1	1	0	0	0	2	1	0	0	0	0	0	0	0	0	0	0	0	0	0	0	0	0	0	0	0	1	0	1	0	1	1	0	0	0	0	0	0	0	0	0	0	0	0	0	0	0	0	0
Sta_80alpha	0	4	3	105	2	0	5	1	0	0	3	0	1	1	2	1	0	0	0	1	2	0	0	0	1	1	12	0	4	3	4	0	105	0	1	3	0	0	0	0	0	0	0	0	0	0	0	0	0
Sta_CNPH82	0	2	2	4	3	0	9	0	0	0	3	8	4	1	1	2	2	0	0	0	2	0	0	0	2	0	3	1	4	2	2	0	4	0	3	0	0	0	0	0	0	0	0	0	0	0	0	0	0
Sta_P954	0	2	1	8	2	0	0	1	1	0	1	1	1	0	0	0	0	0	0	1	0	0	0	0	1	0	3	0	2	1	2	0	8	0	3	1	0	0	0	0	0	0	0	0	0	0	0	0	0
Sta_PH15	0	1	2	4	3	1	0	0	0	0	6	0	1	0	0	2	1	0	0	1	2	0	0	0	1	0	22	0	10	2	1	0	4	0	0	0	0	0	0	0	0	0	0	0	0	0	0	0	0
Sta_SAP2	0	2	4	2	2	0	1	0	0	0	0	4	1	0	0	1	0	2	6	7	5	0	0	0	0	1	8	0	7	4	2	0	2	1	0	0	0	0	0	0	0	0	0	0	1	0	0	0	0
Sta_Twort	1	35	6	47	21	5	1	3	1	2	19	12	4	2	0	1	4	1	6	7	8	2	0	2	9	1	108	6	115	6	35	1	47	8	19	1	0	0	0	2	0	28	2	0	3	14	19	0	0
Sta_aureus_PVL	0	1	2	2	1	0	0	0	0	0	2	1	1	0	0	0	0	0	2	1	0	0	0	0	0	0	2	0	4	2	1	0	2	0	0	0	0	0	0	0	0	0	0	0	0	0	0	0	0
Sta_aureus_phiNM2	0	0	0	0	0	0	1	0	0	0	0	0	0	0	0	0	0	0	0	0	0	0	0	0	0	0	2	0	1	0	0	0	0	0	5	0	0	0	0	0	0	0	0	0	0	0	0	0	0
Sta_aureus_phiNM4	0	0	0	0	1	0	0	0	0	0	0	0	0	0	0	0	0	0	0	0	0	0	0	0	0	0	0	0	0	0	0	0	0	0	0	0	0	0	0	0	0	0	0	0	0	0	0	0	0
Sta_aureus_phiP68	0	0	0	0	0	0	0	0	0	0	1	0	0	0	0	0	0	0	0	0	0	0	0	0	0	0	0	0	0	0	0	0	0	0	0	0	0	0	0	0	0	0	0	0	0	0	0	0	0
Sta_aureus_phiPV83	0	1	1	5	3	0	8	1	0	1	3	0	1	0	0	0	0	0	0	1	9	0	0	0	0	0	6	0	7	1	1	0	5	0	2	0	0	0	0	0	0	0	0	0	0	0	0	0	0
Sta_aureus_phi_11	0	1	2	1	0	0	2	0	0	0	0	0	0	0	0	0	0	0	0	0	1	0	0	0	0	0	2	0	0	2	1	0	1	0	0	0	0	0	0	0	0	0	0	0	0	0	0	0	0
Sta_aureus_phi_12	0	0	0	2	3	0	0	0	0	0	1	1	1	0	0	0	0	0	1	0	0	0	0	0	0	0	3	0	4	0	0	0	2	0	0	0	0	0	0	0	0	0	0	0	0	0	0	0	0
Sta_aureus_phi_13	1	1	1	1	1	0	0	0	0	0	2	0	0	0	1	0	0	0	0	0	0	7	0	0	0	0	2	0	6	1	1	1	1	0	0	0	0	0	0	0	0	1	0	0	0	16	4	0	0
Sta_aureus_temperate_phiSLT	0	1	0	0	0	73	0	0	0	0	0	1	0	0	0	0	0	0	0	0	0	0	0	0	0	0	0	0	2	0	1	0	0	0	0	0	0	0	0	0	0	0	0	0	0	0	0	0	0
Sta_phage	0	0	0	0	1	0	0	0	0	0	0	1	0	0	0	1	0	0	1	0	2	0	0	0	0	0	1	0	3	0	0	0	0	0	0	0	0	0	0	0	0	0	0	0	0	0	0	0	0
Sta_phi2958PVL	1	12	2	13	8	0	2	0	0	1	2	4	0	0	0	0	0	0	1	2	1	0	0	0	0	0	13	0	11	2	12	1	13	1	8	0	0	0	0	0	0	0	0	1	1	0	0	0	0
Sta_phiETA2	0	0	0	1	0	0	0	0	0	0	1	0	0	0	0	0	0	0	0	0	0	0	0	0	0	0	0	0	1	0	0	0	1	0	0	0	0	0	0	0	0	0	0	0	0	0	0	0	0
Sta_phiETA3	1	3	0	6	2	0	1	3	0	0	2	0	0	1	0	0	0	1	46	0	0	0	0	0	0	0	2	0	3	0	3	1	6	1	0	1	0	0	0	0	0	0	0	0	0	0	0	0	0
Sta_phiMR11	1	0	1	0	0	1	0	0	0	1	0	2	0	0	0	0	0	0	1	0	0	0	0	0	0	0	3	0	2	1	0	1	0	1	0	1	0	0	0	0	0	0	0	0	0	0	0	0	0
Sta_phiMR25	0	0	0	5	1	0	0	0	0	0	0	1	1	0	0	0	2	0	1	0	0	0	0	0	0	0	4	0	2	0	0	0	5	0	0	2	0	0	0	0	0	0	0	0	1	0	0	0	0
Sta_phiN315	0	0	2	2	0	1	0	0	0	0	0	0	0	0	0	0	0	0	1	0	0	1	0	0	0	0	0	0	4	2	0	0	2	0	0	0	0	0	0	0	0	0	0	0	0	0	0	0	0
Sta_phiNM	0	1	0	5	0	0	0	0	0	0	0	0	1	0	0	0	0	1	0	0	1	0	0	0	0	0	2	0	7	0	1	0	5	0	3	0	0	0	0	0	0	0	0	0	0	0	0	0	0
Sta_phiNM3	0	2	0	0	2	4	0	0	0	0	0	0	0	0	1	0	0	0	0	1	0	0	0	0	0	0	1	0	3	0	2	0	0	6	0	0	0	0	0	0	0	0	0	0	1	0	0	0	0
Sta_phiPVLCN125	0	0	0	0	0	0	0	13	0	5	0	0	0	0	0	0	0	0	0	0	0	0	0	0	1	0	0	1	1	0	0	0	0	0	0	0	0	0	0	0	0	0	0	0	0	0	0	0	0
Sta_phiSauSIPLA35	0	1	1	1	1	0	0	1	0	0	1	0	0	0	0	1	0	0	0	0	2	0	0	0	0	0	2	0	3	1	1	0	1	0	0	0	0	0	0	0	0	0	0	0	0	0	0	0	0
Sta_phiSauSIPLA88	0	2	2	3	1	0	0	0	0	0	4	0	0	0	0	0	0	0	0	2	0	0	0	0	0	0	2	0	5	2	2	0	3	0	3	1	0	0	0	0	0	0	0	0	0	0	0	0	0
Sta_tp3101	0	0	0	1	0	0	0	0	0	0	1	0	0	0	0	0	0	0	0	0	0	0	0	0	0	0	0	0	0	0	0	0	1	0	0	1	0	0	0	0	0	0	0	0	0	0	0	0	0
Sta_tp3102	0	0	2	2	0	0	0	0	0	0	2	1	0	0	0	1	0	0	0	0	0	0	0	0	0	0	0	0	0	2	0	0	2	4	0	0	0	0	0	0	0	0	0	0	0	0	0	0	0
Sta_tp3103	0	0	0	0	0	0	1	0	0	0	0	0	0	0	0	0	0	0	0	0	0	0	0	0	0	0	0	0	0	0	0	0	0	0	0	0	0	0	0	0	0	0	0	0	0	0	0	0	0
Ste_S1	10	3	1	0	7	0	0	0	0	0	1	0	1	0	0	0	0	0	8	6	2	0	0	0	1	0	0	0	2	1	3	10	0	33	12	21	0	0	0	0	0	0	0	0	0	1	1	0	0
Str_5093	0	0	1	6	3	0	0	1	0	0	0	0	0	0	0	0	0	0	1	1	7	0	0	0	1	1	0	0	6	1	0	0	6	0	0	0	0	0	0	0	0	0	1	0	0	0	0	0	0
Str_858	0	0	0	0	1	0	0	0	0	0	0	0	0	0	0	1	0	0	0	0	0	0	0	0	0	0	0	0	2	0	0	0	0	0	0	0	0	0	0	0	0	0	0	0	0	16	0	0	0
Str_ALQ132	0	0	0	3	0	0	0	0	0	0	1	0	0	0	0	0	0	0	0	0	1	0	0	0	0	0	3	0	5	0	0	0	3	0	0	0	0	0	0	0	0	0	0	0	0	1	0	0	0
Str_Abc2	0	1	0	3	1	0	0	0	0	0	0	2	1	0	0	0	0	0	0	1	1	0	0	0	1	0	18	1	2	0	1	0	3	0	8	0	0	0	0	0	0	0	0	0	0	24	1	0	0
Str_C1	0	0	1	4	2	0	1	1	0	1	1	0	0	0	0	0	1	0	1	0	0	0	0	0	0	2	1	0	2	1	0	0	4	2	0	0	0	0	0	0	0	0	0	0	0	0	1	0	0
Str_Cp1	0	2	2	11	0	0	0	0	0	0	1	0	0	0	0	0	0	0	0	1	0	0	0	0	0	0	8	0	6	2	2	0	11	0	0	0	0	0	0	0	0	0	0	0	0	0	0	0	0
Str_M102	0	1	0	4	3	1	1	2	0	0	0	1	0	0	0	0	0	0	0	1	0	0	0	0	1	0	7	0	2	0	1	0	4	0	1	0	0	0	0	0	0	0	0	0	0	0	0	0	0
Str_MM1_1998	1	5	4	4	3	0	2	1	0	0	4	2	0	1	1	1	0	0	8	3	6	10	0	0	0	1	5	0	4	4	5	1	4	0	2	1	0	0	0	0	0	0	0	0	0	0	0	0	0
Str_P9	0	0	1	1	0	0	3	0	0	0	2	1	0	0	0	0	0	0	2	1	18	0	0	0	0	0	1	0	2	1	0	0	1	0	0	0	0	0	0	0	0	0	0	0	0	0	0	0	0
Str_PH10	0	1	0	1	2	6	0	0	0	0	0	0	0	0	0	0	0	0	0	0	5	0	0	0	0	0	9	0	9	0	1	0	1	0	1	0	0	0	0	0	0	0	0	0	0	1	0	0	0
Str_PH15	0	2	1	2	0	0	0	1	0	0	4	4	0	0	0	0	0	0	0	1	0	0	0	0	1	0	5	1	6	1	2	0	2	11	1	0	0	0	0	0	0	1	0	0	0	0	0	0	0
Str_SMP	2	1	0	1	2	0	1	2	0	0	0	1	0	1	0	2	2	0	0	1	0	1	91	94	0	0	2	0	2	0	1	2	1	1	0	0	0	0	0	0	0	0	0	0	0	0	0	0	0
Str_mitis_SM1	0	1	3	1	0	2	0	0	0	0	0	0	0	0	0	0	0	0	3	1	4	0	0	0	0	0	3	0	4	3	1	0	1	0	0	0	0	0	1	0	0	0	0	0	0	0	0	0	0
Str_mu16	60	7	6	0	1	1	0	3	0	0	5	1	0	0	0	1	0	1	18	19	0	0	0	0	0	0	0	0	1	6	7	60	0	2	12	12	0	0	0	0	0	0	0	0	0	0	0	0	0
Str_phi3396	0	5	3	8	0	0	2	0	2	0	1	0	2	0	2	0	0	1	5	3	12	0	0	0	0	0	3	0	3	3	5	0	8	2	0	0	0	0	0	0	0	0	0	0	0	1	0	0	0
Str_pyogenes_3151	0	1	1	5	1	0	1	1	0	0	1	1	0	0	1	1	0	0	0	0	0	0	0	0	0	0	10	0	3	1	1	0	5	1	1	0	0	0	0	0	0	0	0	0	0	1	0	0	0
Str_pyogenes_3152	1	2	0	1	1	0	2	0	0	0	1	2	0	0	0	0	1	0	0	0	0	0	0	0	1	0	3	1	2	0	2	1	1	0	2	1	0	0	0	0	0	0	0	0	0	0	0	0	0
Str_pyogenes_3153	0	4	3	3	0	0	4	0	0	0	2	0	2	0	0	0	1	0	3	5	6	0	0	0	0	0	2	0	5	3	4	0	3	1	0	0	0	0	0	0	0	0	0	0	0	0	0	0	0
Str_pyogenes_3155	1	0	4	2	4	0	1	1	0	0	1	0	1	0	0	0	0	0	0	0	1	0	0	0	0	1	5	0	2	4	0	1	2	1	2	2	0	0	0	0	0	0	0	0	0	1	0	0	1
Str_pyogenes_3156	0	0	1	4	2	0	1	0	0	1	4	2	1	1	0	0	0	0	0	0	0	0	0	0	0	0	9	0	3	1	0	0	4	1	2	0	0	0	0	0	0	0	0	0	0	0	0	0	0
Str_thermophilus_2972	0	8	0	2	7	0	0	0	0	0	2	1	0	0	1	0	0	0	0	0	0	0	0	0	2	1	9	2	9	0	8	0	2	11	2	0	0	0	1	0	0	0	0	0	0	0	0	0	0
Str_thermophilus_7201	2	1	4	4	1	0	0	0	0	0	3	0	0	0	0	0	0	0	7	5	0	1	0	0	0	0	5	0	4	4	1	2	4	0	0	0	0	0	0	0	0	0	0	0	0	0	0	0	0
Str_thermophilus_DT1	0	0	0	11	2	0	0	0	0	1	0	0	0	0	0	0	0	0	1	0	2	0	0	0	0	1	3	0	3	0	0	0	11	1	0	0	0	0	0	0	0	0	0	0	0	0	0	0	0
Str_thermophilus_Sfi11	0	1	4	5	4	0	0	0	0	0	1	5	2	0	0	0	0	0	1	0	0	0	0	0	0	1	19	0	8	4	1	0	5	0	18	0	0	0	0	0	0	0	0	0	1	0	0	0	7
Str_thermophilus_Sfi19	0	5	1	1	0	0	4	0	0	0	1	0	0	0	0	0	1	0	5	0	0	0	0	0	0	0	0	0	0	1	5	0	1	2	0	0	0	0	0	0	0	0	0	0	0	0	0	0	0
Str_thermophilus_Sfi21	0	0	0	4	2	0	0	1	0	2	1	0	0	0	0	0	0	1	0	0	0	0	0	0	0	0	6	0	4	0	0	0	4	0	3	0	0	0	0	0	0	0	0	0	0	2	0	0	0
Str_thermophilus_temperate_O1205	0	2	2	6	2	0	0	0	0	0	2	0	0	0	0	0	0	0	4	3	1	0	0	0	1	0	3	0	2	2	2	0	6	2	0	3	0	0	0	0	0	0	0	0	0	0	0	0	0
Stx_1717	5	0	1	5	1	0	3	1	0	1	4	0	0	0	0	0	0	0	1	1	2	0	0	0	1	0	0	1	7	1	0	5	5	8	54	13	0	0	0	0	0	0	0	0	0	0	0	0	0
Stx_86	2	1	2	0	0	7	0	1	0	0	1	1	0	0	0	0	0	0	0	0	0	0	0	0	1	0	1	0	2	2	1	2	0	2	9	2	0	0	0	0	0	0	0	0	0	0	0	0	0
Stx_converting_I	2	0	3	1	2	13	1	0	0	0	0	0	0	0	0	2	0	0	2	6	1	3	0	2	0	0	2	0	2	3	0	2	1	3	38	6	0	0	0	0	0	0	0	0	0	0	1	0	0
Stx_converting_bacteriophage	1	0	0	0	0	1	0	0	0	0	0	0	0	0	0	0	0	0	0	0	0	0	0	0	0	0	0	0	0	0	0	1	0	0	4	0	0	0	0	0	0	0	0	0	0	0	0	0	0
Sul_EE36phi1	4	3	0	1	1	1	0	3	0	0	14	1	1	4	0	0	0	1	2	2	7	0	0	0	0	1	5	0	3	0	3	4	1	39	21	5	0	0	0	0	0	0	0	0	0	0	0	0	0
Sul_islandicus_filamentous_virus	0	6	4	11	6	0	0	0	0	0	4	1	0	0	0	0	1	0	2	0	1	0	0	0	0	1	19	0	24	4	6	0	11	15	4	3	0	0	0	0	0	0	0	0	0	0	0	0	0
Sul_islandicus_rodshaped_virus_1	0	4	1	10	8	1	2	0	0	0	8	3	2	1	1	2	0	0	0	2	2	0	0	0	2	0	11	0	11	1	4	0	10	7	2	1	0	0	0	0	0	0	0	0	0	0	0	0	0
Sul_islandicus_rodshaped_virus_2	0	10	3	7	7	0	1	0	0	3	3	6	0	0	0	0	0	1	1	0	4	0	0	0	1	1	18	0	17	3	10	0	7	1	1	0	0	0	0	0	0	3	0	0	0	0	0	0	0
Sul_ssv_5	0	0	1	0	0	0	0	0	0	0	1	0	0	0	0	0	0	1	0	0	0	0	0	0	0	0	0	0	3	1	0	0	0	0	0	0	0	0	0	0	0	0	0	0	0	0	0	0	0
Sul_ssv_6	0	0	0	2	0	0	0	0	0	0	1	0	0	0	0	0	0	0	0	0	0	0	0	0	1	1	4	1	0	0	0	0	2	1	0	2	0	0	0	0	0	0	0	0	0	0	0	0	0
Sul_ssv_7	0	0	1	1	0	0	1	0	0	0	0	0	0	0	0	0	0	0	0	0	0	0	0	0	0	0	3	0	3	1	0	0	1	0	0	0	0	0	0	0	0	0	0	0	0	0	0	0	1
Sul_virus_1	0	0	3	3	1	0	1	2	0	0	0	0	0	0	0	0	0	0	0	0	0	0	1	7	0	0	2	0	3	3	0	0	3	0	0	0	0	0	0	0	0	0	0	0	0	0	0	0	0
Sul_virus_2	0	0	0	4	1	0	0	0	0	0	0	0	0	0	0	0	0	0	0	2	2	0	0	3	0	0	2	0	2	0	0	0	4	0	1	0	0	0	0	0	0	0	0	0	0	0	0	0	0
Sul_virus_Kamchatka_1	0	0	0	1	0	0	0	0	0	0	0	0	0	0	0	0	0	0	0	0	0	0	0	2	0	0	1	0	0	0	0	0	1	0	0	0	0	0	0	0	0	0	0	0	0	0	0	0	0
Sul_virus_Ragged_Hills	0	0	1	4	1	0	0	0	1	0	0	0	0	0	0	0	0	0	0	0	0	0	0	3	0	0	2	0	2	1	0	0	4	0	0	0	0	0	0	0	0	0	0	0	0	0	0	0	0
Sul_virus_STSV1	2	5	1	9	6	69	1	0	0	0	7	1	2	0	1	0	0	0	4	5	1	0	0	0	1	1	6	1	19	1	5	2	9	6	4	2	1	0	0	0	0	0	0	0	0	0	0	0	0
Syn_SRSM4	40	79	40	130	10	1	1	6	0	1	27	32	8	6	1	7	5	6	12	13	11	7	1	0	2	0	17	0	21	40	79	40	130	8	16	12	0	0	0	0	0	0	0	0	1	5	13	0	1
Syn_SSM1	4	52	32	123	11	17	1	5	0	0	12	25	3	3	2	2	2	8	12	9	3	3	0	0	2	1	14	2	20	32	52	4	123	17	3	27	0	0	0	0	0	0	0	0	0	4	1	0	1
Syn_SSM2	16	169	115	779	17	7	2	9	0	1	18	35	7	6	1	7	2	3	7	11	20	4	2	0	2	0	15	2	18	115	169	16	779	21	67	13	0	0	0	0	0	0	0	2	7	0	2	0	2
Syn_SSSM5	6	61	21	168	9	1	1	3	0	1	15	29	5	6	2	2	2	0	6	4	0	3	0	0	2	0	18	0	12	21	61	6	168	6	14	1	0	0	0	0	0	0	0	0	0	0	0	0	0
Syn_SSSM7	6	73	33	366	20	1	49	2	0	0	34	34	10	6	2	0	4	2	16	27	25	4	0	0	2	1	17	1	36	33	73	6	366	15	23	4	0	0	0	0	0	0	0	0	1	0	1	0	0
Syn_Syn5	8	5	4	17	1	0	0	1	0	0	3	2	0	0	1	1	2	1	1	0	0	0	0	0	0	0	1	0	4	4	5	8	17	0	0	6	0	0	0	0	0	0	0	0	0	0	0	0	0
Syn_Syn9	24	47	27	126	7	5	0	4	0	1	23	25	4	2	6	3	6	0	8	6	10	20	0	0	0	1	13	0	25	27	47	24	126	23	5	2	1	0	0	0	0	0	0	0	0	1	1	0	1
TT_virus_genotype_6	0	0	0	0	0	0	0	0	0	0	0	0	0	0	1	0	0	0	1	0	0	0	0	0	0	0	1	0	0	0	0	0	0	8	0	55	0	0	0	0	0	1	0	0	0	0	0	0	0
Tem_PhiNIH11	1	3	3	9	1	1	0	1	0	0	1	1	0	0	0	0	0	0	1	1	4	0	0	0	0	0	5	0	1	3	3	1	9	0	0	0	0	0	0	0	0	0	0	0	2	0	0	0	0
Tha_BA3	2	7	7	1	0	0	0	3	0	0	7	1	2	1	1	1	3	2	10	0	4	0	0	0	0	0	4	0	3	7	7	2	1	0	2	1	0	0	0	0	0	0	0	0	0	0	0	0	1
The_P2345	4	2	3	2	0	0	0	0	0	0	0	0	0	0	0	1	0	0	4	2	0	0	0	0	0	0	0	0	0	3	2	4	2	1	9	60	0	0	0	0	0	0	0	0	0	0	0	0	0
The_P7426	6	1	2	2	5	0	0	0	0	0	1	1	0	0	0	0	0	0	0	1	0	0	1	0	0	0	2	0	1	2	1	6	2	2	11	2	0	0	0	0	0	0	0	0	0	0	0	0	0
The_phiYS40	1	18	10	28	13	3	5	2	1	2	9	19	2	0	2	6	4	1	11	6	19	0	0	0	3	4	44	2	37	10	18	1	28	5	9	37	0	0	0	0	0	0	0	0	1	0	0	0	0
The_tenax_spherical_virus_1	0	0	0	0	0	0	0	0	0	0	0	0	0	0	1	0	0	0	0	0	0	0	0	0	0	0	0	0	0	0	0	0	0	0	0	0	0	0	0	0	0	0	0	0	0	0	0	0	0
Vib_K139	0	3	0	1	1	0	0	0	0	0	1	2	0	0	0	0	0	0	0	0	0	0	0	0	0	0	0	0	0	0	3	0	1	55	0	0	0	0	0	0	0	0	0	0	0	0	0	0	0
Vib_N4	0	3	1	6	0	0	1	0	0	0	5	2	3	0	0	0	0	0	8	2	3	0	0	0	0	0	8	0	9	1	3	0	6	0	1	0	0	0	0	0	0	1	0	0	0	1	0	0	0
Vib_VEJphi	0	0	1	0	4	0	0	0	0	0	0	0	0	0	0	0	0	0	0	0	0	0	0	0	0	0	0	0	0	1	0	0	0	0	0	0	0	0	0	0	0	0	0	0	0	0	0	0	0
Vib_VP2	0	4	1	2	0	1	0	0	0	0	0	0	0	1	0	0	0	0	2	2	0	0	0	0	1	0	0	1	4	1	4	0	2	5	2	2	0	0	0	0	0	0	0	0	0	0	0	0	0
Vib_VP4	0	1	0	3	0	0	0	0	0	0	0	1	0	0	0	0	0	0	2	0	0	0	0	0	1	0	1	1	4	0	1	0	3	2	0	1	0	0	0	0	0	0	0	0	0	0	0	0	0
Vib_VP5	1	1	0	4	2	0	0	1	0	0	1	0	0	1	1	0	3	0	6	7	2	0	0	0	0	0	0	0	0	0	1	1	4	1	4	1	0	0	0	0	0	0	0	0	0	0	0	0	0
Vib_VP882	18	1	2	1	5	1	0	0	0	0	5	0	0	0	0	0	1	0	1	4	1	0	0	0	0	0	2	0	2	2	1	18	1	0	0	5	0	0	0	0	0	0	0	0	0	0	0	0	0
Vib_VP93	7	0	1	2	0	1	1	1	0	0	1	1	0	0	0	2	0	0	0	0	0	0	0	0	0	0	1	0	2	1	0	7	2	0	0	1	0	0	0	0	0	0	0	0	0	0	0	0	1
Vib_VSK	0	0	0	0	0	0	0	0	0	0	0	0	1	0	0	0	0	0	2	1	0	0	0	0	0	0	0	0	0	0	0	0	0	0	0	0	0	0	0	0	0	0	0	0	0	0	0	0	0
Vib_VpV262	0	1	0	0	0	0	0	0	0	0	1	0	0	0	0	0	0	0	2	2	0	0	0	0	0	0	1	0	0	0	1	0	0	1	0	0	0	0	0	0	0	0	0	0	0	0	0	0	0
Vib_cholerae_KSF1phi	0	0	0	6	0	0	0	0	0	0	0	0	0	0	0	0	0	0	0	0	0	0	0	0	0	0	0	0	0	0	0	0	6	0	0	0	0	0	0	0	0	0	0	0	0	0	0	0	0
Vib_cholerae_O139_fs1_phage	0	0	0	0	0	0	0	0	0	0	0	0	0	0	0	0	0	0	1	0	0	0	0	0	0	0	0	0	0	0	0	0	0	0	0	0	0	0	0	0	0	0	0	0	0	0	0	0	0
Vib_cholerae_VGJphi	0	1	0	0	0	0	0	0	0	0	0	0	0	0	0	0	0	0	0	0	0	0	0	0	0	0	0	0	0	0	1	0	0	0	0	0	0	0	0	0	0	0	0	0	0	0	0	0	0
Vib_cholerae_filamentous_fs2	1	0	0	0	0	0	0	2	0	0	0	0	0	1	0	0	0	0	1	0	0	0	0	0	0	0	0	0	0	0	0	1	0	0	1	0	0	0	0	0	0	0	0	0	0	0	0	0	0
Vib_harveyi_VHML	1	1	1	5	1	0	0	1	0	0	1	2	0	0	0	0	0	0	0	2	0	0	0	0	0	0	1	0	1	1	1	1	5	0	3	4	0	0	0	0	0	0	0	0	0	0	0	0	0
Vir_PhiCh1	23	7	8	1	8	0	0	48	0	3	5	0	0	2	3	0	4	0	2	4	1	0	0	0	0	0	0	0	0	8	7	23	1	0	2	5	0	0	0	0	0	0	0	0	0	66	152	0	0
Xan_Cf1c	2	1	0	0	1	0	0	0	0	0	1	0	0	0	0	0	0	0	0	0	0	0	0	0	0	0	0	0	0	0	1	2	0	0	0	0	0	0	0	0	0	0	0	0	0	0	0	0	0
Xan_OP1	3	0	4	2	0	0	0	0	0	0	0	0	1	0	0	1	0	0	1	2	0	0	0	0	1	0	0	1	2	4	0	3	2	0	0	0	0	0	0	4	0	61	2	0	0	0	1	0	0
Xan_OP2	13	1	2	0	0	0	0	3	0	0	3	1	0	1	0	2	0	0	3	1	0	1	1	0	0	1	0	0	2	2	1	13	0	0	8	1	0	0	0	0	0	0	0	0	0	0	0	0	0
Xan_Xop411	3	1	2	1	4	1	0	0	0	0	2	1	0	0	0	2	0	0	1	0	1	1	0	1	0	0	0	0	2	2	1	3	1	0	0	0	0	0	0	0	0	0	0	0	0	0	0	0	0
Xan_campestris_pv_pelargonii_Xp15	15	5	1	3	4	0	0	1	0	0	4	1	0	0	1	1	1	1	1	5	1	1	1	0	0	0	2	0	2	1	5	15	3	2	3	0	0	0	0	0	0	0	0	0	0	0	0	0	0
Xan_oryzae_Xp10	0	2	0	1	1	0	0	0	0	0	0	0	0	0	0	1	0	0	2	2	0	0	0	0	0	0	0	0	0	0	2	0	1	1	2	0	0	0	0	0	0	0	0	0	0	0	0	0	0
Xan_phiL7	7	1	4	2	2	0	0	0	0	0	0	0	0	0	0	0	0	0	0	0	1	0	0	1	0	0	0	0	1	4	1	7	2	1	2	1	0	0	0	0	0	0	0	0	0	0	0	0	0
Yer_Berlin	0	2	0	0	5	0	0	3	0	0	0	0	0	0	0	0	0	0	0	0	0	0	0	0	0	0	0	0	0	0	2	0	0	0	0	0	0	0	0	0	0	0	0	0	0	0	0	0	0
Yer_Yepe2	0	2	2	1	1	0	1	0	1	0	2	4	0	0	0	1	0	0	1	3	0	0	0	0	1	0	2	1	3	2	2	0	1	7	0	0	0	0	0	0	0	0	0	0	0	0	0	0	0
Yer_pestis_phiA1122	0	0	1	3	0	0	0	1	1	0	4	1	0	0	0	0	0	0	0	0	0	0	3	0	0	0	0	0	0	1	0	0	3	7	0	0	0	0	5	0	0	0	0	0	0	0	0	0	0
bac_phiKMV	0	0	0	0	0	0	0	0	0	0	0	0	0	0	0	0	0	0	0	0	0	0	0	0	0	0	0	0	0	0	0	0	0	0	4	0	0	0	0	0	0	0	0	0	0	0	0	0	0
[truncated: 73 more columns]
